# Supplementary material for: Lumbopelvic pain, anxiety, physical activity and mode of conception: a prospective cohort study of pregnant women
Source: PubMed Central journal article supplement — BMJ Open. 2018 Nov 1;8(11):e022508. doi: 10.1136/bmjopen-2018-022508 (PMC6224755; doi:10.1136/bmjopen-2018-022508), 2018-11-01
Supplement: bmjopen-2018-022508.draft_revisions.pdf [file bmjopen-2018-022508.draft_revisions.pdf]

# BMJ Open

BMJ Open is committed to open peer review. As part of this commitment we make the peer review history of every article we publish publicly available.

When an article is published we post the peer reviewers' comments and the authors' responses online. We also post the versions of the paper that were used during peer review. These are the versions that the peer review comments apply to.

The versions of the paper that follow are the versions that were submitted during the peer review process. They are not the versions of record or the final published versions. They should not be cited or distributed as the published version of this manuscript.

BMJ Open is an open access journal and the full, final, typeset and author-corrected version of record of the manuscript is available on our site with no access controls, subscription charges or pay-per-view fees (<http://bmjopen.bmj.com>).

If you have any questions on BMJ Open's open peer review process please email [info.bmjopen@bmj.com](mailto:info.bmjopen@bmj.com)

# BMJ Open

## The relationship between the mode of conception and pregnancy-related pelvic girdle pain, anxiety and physical activity behaviors: a cohort study

|                               |                                                                                                                                                                                                                                                                                                                                                                                                                                                                                                      |
|-------------------------------|------------------------------------------------------------------------------------------------------------------------------------------------------------------------------------------------------------------------------------------------------------------------------------------------------------------------------------------------------------------------------------------------------------------------------------------------------------------------------------------------------|
| Journal:                      | <i>BMJ Open</i>                                                                                                                                                                                                                                                                                                                                                                                                                                                                                      |
| Manuscript ID                 | bmjopen-2018-022508                                                                                                                                                                                                                                                                                                                                                                                                                                                                                  |
| Article Type:                 | Research                                                                                                                                                                                                                                                                                                                                                                                                                                                                                             |
| Date Submitted by the Author: | 28-Feb-2018                                                                                                                                                                                                                                                                                                                                                                                                                                                                                          |
| Complete List of Authors:     | Lardon, Emeline; Universite du Quebec a Trois-Rivieres; Institut Franco-Européen de Chiropraxie<br>St-Laurent, Audrey; Universite du Quebec a Trois-Rivieres<br>Babineau, Véronique; Department of Obstetrics and Gynaecology, Centre intégré universitaire de santé et de services sociaux de la Mauricie-et-du-Centre-du-Québec, affiliated to the University of Montreal<br>Descarreaux, M; Universite du Quebec, Human kinetics<br>Ruchat, Stephanie-May; Universite du Quebec a Trois-Rivieres, |
| Keywords:                     | pregnancy, fertility treatments, pelvic girdle pain, anxiety, physical limitation, physical activity                                                                                                                                                                                                                                                                                                                                                                                                 |
|                               |                                                                                                                                                                                                                                                                                                                                                                                                                                                                                                      |

SCHOLARONE™  
Manuscripts

1  
2  
3 **Manuscript title:** The relationship between the mode of conception and pregnancy-related  
4 pelvic girdle pain, anxiety and physical activity behaviors: a cohort study  
5  
6

7 Emeline Lardon<sup>1,2</sup>, Audrey St-Laurent<sup>1</sup>, Véronique Babineau<sup>3</sup>, Martin Descarreaux<sup>1</sup>,  
8 Stephanie-May Ruchat<sup>1</sup>  
9  
10

11  
12 **Authors Institutional Information**

13  
14 <sup>1</sup> Département de Human Kinetics, Université du Québec à Trois-Rivières, Trois-Rivières,  
15 Canada  
16

17 <sup>2</sup> Institut Franco-Européen de Chiropraxie, Paris, France  
18

19 <sup>3</sup> Département de Obstetrics and Gynaecology, Centre intégré universitaire de santé et de  
20 services sociaux de la Mauricie-et-du-Centre-du-Québec, affiliated to the University of  
21 Montreal, Trois-Rivières, Canada  
22  
23

24  
25  
26  
27 **Corresponding author:**

28 Stephanie-May Ruchat, PhD,  
29 Professor, Department of Human Kinetics  
30 Université du Québec à Trois-Rivières  
31 3351, Boul Des Forges, Trois-Rivières, QC G9A 5H7  
32  
33 E-mail : [stephanie-may.ruchat@uqtr.ca](mailto:stephanie-may.ruchat@uqtr.ca)  
34  
35  
36  
37  
38

39 **Key words:** pregnancy; fertility treatments; pelvic girdle pain; anxiety; physical activity.  
40

41 **Word count:** 2873  
42  
43  
44  
45  
46  
47  
48  
49  
50  
51  
52  
53  
54  
55  
56  
57  
58  
59  
60

## ABSTRACT

**Objectives:** Pregnancy-related pelvic girdle pain (PPGP) is a frequent condition known to significantly affect women's daily life. The etiology of PPGP is still not clearly established but the mode of conception has been suggested to contribute to PPGP. Anxiety related to fertility treatments may be one of the contributing factors. The primary objectives were to determine the evolution of PPGP prevalence and severity, and anxiety, throughout pregnancy in women who conceived spontaneously (SP) or after fertility treatments (FT). We also examined the relationship between PPGP severity and anxiety. The secondary objective was to determine the evolution of physical limitations and physical activity and their correlation with the severity of PPGP.

**Design:** Prospective cohort study.

**Setting:** Pregnant women were recruited through physicians' referrals, posters and newspaper advertisements in the local communities.

**Participants:** Fifty-nine pregnant women (33 SP and 26 FT) were assessed during the 1<sup>st</sup>, 2<sup>nd</sup> and 3<sup>rd</sup> trimester of pregnancy.

**Primary and secondary outcome measures:** PPGP prevalence and severity (primary), trait and state anxiety, physical limitations and physical activity levels (secondary).

**Results:** There was no relationship between the mode of conception and our outcomes. The prevalence and severity of PPGP increased over the course of pregnancy (time effect,  $p < 0.0001$ ) whereas trait anxiety decreased from early to mid-pregnancy (time effect,  $p = 0.03$ ). Physical limitations increased throughout pregnancy (time effect,  $p < 0.0001$ ) and physical activity levels decreased (time effect,  $p < 0.0001$ ). The severity of PPGP was positively correlated with physical limitations ( $r = 0.51$  to  $0.55$ ) but negatively with physical activity levels ( $r = -0.39$  to  $-0.41$ ).

1  
2  
3 **Conclusions:** Maternal health-related factors, such as PPGP, anxiety and physical activity,  
4 are not different in women who conceived spontaneously or after fertility treatments. The  
5 more PPGP was severe, the more the women were physically limited and inactive, suggesting  
6 that the clinical management of PPGP might decrease physical limitation during pregnancy.  
7  
8  
9  
10  
11 (299)

### 12 13 14 15 **Strengths and limitations of this study**

- 16  
17  
18 • This is a prospective cohort study of pregnant women who were assessed at each  
19 trimester of pregnancy, allowing to assess the evolution of several maternal health-related  
20 factors that are known to change over the course of pregnancy;  
21  
22  
23
- 24 • Primary and secondary outcomes were collected using validated tools;  
25  
26
- 27 • One third of our sample achieved a pregnancy after *in vitro* fertilization, which may have  
28 limited our ability to find higher anxiety levels and PPGP incidence in women who  
29 conceived after fertility treatments compared to those who conceived naturally;  
30  
31
- 32 • More than half of the participants had a university degree and the results may not be  
33 generalizable to a wider population of pregnant women.  
34  
35  
36  
37  
38  
39  
40  
41  
42  
43  
44  
45  
46  
47  
48  
49  
50  
51  
52  
53  
54  
55  
56  
57  
58  
59  
60

## INTRODUCTION

Pregnancy-related pelvic girdle pain (PPGP) is defined by pain “experienced between the posterior iliac crest and the gluteal fold, particularly in the vicinity of the sacroiliac joint. The pain may radiate in the posterior thigh and can also occur in conjunction with/or separately in the symphysis”<sup>1</sup>. Using this definition, large prospective studies with objectively measured symptoms reported a PPGP prevalence between 16% and 25%<sup>2</sup>. The onset of PPGP varies considerably, between the end of the first trimester to the first month post-delivery, with a peak of symptoms generally occurring between the 24th and 36th weeks of pregnancy<sup>2</sup>. Pelvic girdle pain (PGP) is a debilitating condition during pregnancy that is known to affect women’s quality of life. For instance, sleep, physical functioning, social life and hobbies are affected<sup>3,4</sup>. Importantly, PPGP represents the main cause of sick leave<sup>5,6</sup> and has therefore significant socioeconomic impact. Pregnant women experiencing PGP are also less likely to be physically active<sup>7</sup>, thereby preventing them to benefit from the numerous positive health effects of prenatal exercise<sup>8</sup>.

Several factors are believed to be involved in PPGP development<sup>1,2</sup>. One factor of interest is the mode of conception, in other words, naturally or after fertility treatments. A study reported that pregnant women who underwent *in vitro* fertilization (IVF) treatments had a two times higher prevalence rate of sacral pain in early and late pregnancy, as well as a higher prevalence of positive results on pelvic pain provocation tests in late pregnancy<sup>9</sup>. One of the reasons that might explain higher PPGP prevalence in women who conceived after IVF is higher anxiety levels. As reported by a systematic review, women who conceived following fertility treatments had greater pregnancy-specific anxiety than those who conceived naturally<sup>10</sup> and higher levels of anxiety have been found to be among the most notable factors associated with a higher likelihood of reporting PPGP<sup>11</sup>. However, additional studies are

1  
2  
3 needed to confirm the relationship between the mode of conception and PPGP, and whether  
4  
5 anxiety is a contributing factor.

6  
7 The primary objectives of this prospective cohort study were to determine the evolution of  
8  
9 PPGP prevalence and severity, as well as anxiety, over the course of pregnancy in women  
10  
11 who conceived naturally or after fertility treatments, and to examine the possible relationship  
12  
13 between PPGP severity and anxiety levels. As PPGP has a significant impact on the women's  
14  
15 daily life, the secondary objective of our study was to determine the evolution of physical  
16  
17 limitations and physical activity behaviors throughout pregnancy and whether the severity of  
18  
19 PPGP was correlated to these factors. Our primary hypotheses are that PPGP prevalence and  
20  
21 severity, as well as anxiety levels will increase over the course of pregnancy but more  
22  
23 strongly in women who conceived after fertility treatments, and that PPGP severity will be  
24  
25 positively correlated with anxiety levels. As a result, our secondary hypotheses are that  
26  
27 physical limitations will increase whereas physical activity behaviors will decrease over the  
28  
29 course of pregnancy but more significantly in women who conceived after fertility treatments,  
30  
31 and that the severity of PPGP will be positively correlated with physical limitations but  
32  
33 negatively with physical activity behaviors.  
34  
35  
36  
37  
38

## 39 **MATERIALS AND METHODS**

### 40 **Study design and participants' selection**

41  
42  
43 Between October 2015 and September 2016, women who achieved a spontaneous pregnancy  
44  
45 (SP group) and women who achieved pregnancy following fertility treatments (FT group)  
46  
47 were recruited through physicians' referrals, posters and newspaper advertisements in the  
48  
49 local and surrounding communities. Women under 14 weeks of gestation, with a singleton  
50  
51 pregnancy and able to understand, speak and write French were considered eligible to  
52  
53 participate in the study. The study was approved by the local Research Ethics Committees  
54  
55  
56  
57  
58  
59  
60

1  
2  
3 (CER-2015-003 and CER-15-214-07.10) and all participants provided their written informed  
4  
5 consent.

### 6 7 **Outcome measures and measurement tools**

8  
9 Women were followed from the 1<sup>st</sup> trimester of pregnancy until delivery through three  
10  
11 evaluations (1<sup>st</sup> trimester [TR1]: 10–16 weeks, 2<sup>nd</sup> trimester [TR2]: 24–28 weeks and 3<sup>rd</sup>  
12  
13 trimester [TR3]: 32–36 weeks of gestation). In each trimester, women were asked if they have  
14  
15 had PPGP over the last 7 days or were having PPGP presently. If a woman had had or was  
16  
17 having PPGP, she was asked to evaluate pain intensity using a visual analog pain scale  
18  
19 (VAS). This scale is a self-reported measurement tool used by health professionals allowing  
20  
21 the patient to rate pain from 0 (no pain) to 10 (extreme pain) <sup>12</sup>. We used a picture to localize  
22  
23 the woman's pain to make sure that it was located in the lumbo-pelvic region.

24  
25 The levels of anxiety was assessed during TR1, TR2 and TR3 using the French-Canadian  
26  
27 version <sup>13</sup> of the State-Trait Anxiety Inventory (STAI) <sup>14</sup>. It is a self-reported questionnaire  
28  
29 assessing the presence and severity of current symptoms of anxiety (state anxiety scale) and a  
30  
31 generalized propensity to be anxious (trait anxiety scale). Each scale is based on 20 items on a  
32  
33 four-point response scale. The range of score for each scale is 20-80, the higher score  
34  
35 indicating greater anxiety levels.

36  
37 Physical limitations and symptoms associated with PPGP were assessed in TR2 and TR3  
38  
39 using the completed the French-Canadian version of the PGQ was used <sup>15</sup>. The PGQ is a  
40  
41 condition-specific measure developed for pregnant and postpartum women. It consists of 20  
42  
43 activity items and five symptom items on a four-point response scale and assess physical  
44  
45 limitations and symptoms associated with PGP. The range of score is 0-100%, with a higher  
46  
47 score indicating greater physical limitations and symptoms. The PGQ is reliable and valid for  
48  
49 both pregnant and postpartum women with PGP <sup>16</sup>.



1  
2  
3 Finally, physical activity levels were objectively measured at each trimester of pregnancy  
4 using the ActiGraph GT3X (ActiGraph, Pensacola, FL), a triaxial accelerometer measuring  
5 data in a 60-s epoch. The women were instructed to wear the monitor over the hip on an  
6 elastic belt for seven consecutive days from wake-up time to bedtime. They were allowed to  
7 remove the accelerometer when sleeping, showering or engaging in water activities.  
8  
9 According to the method used in the Canadian Health Measures Survey, valid data were  
10 defined as  $\geq$  four days of monitoring for  $\geq$  10 hours of wear time per day<sup>17</sup>. Pregnant women  
11 were encouraged to maintain their usual activities. Data were processed using the Actilife  
12 software version 6.13.2 (ActiGraph, LLC, FL, USA). The accelerometer data obtained were  
13 averaged across valid wear days. To derive the activity frequency, intensity and duration of  
14 the measured activity in counts per minute per day, the Freedson equation was used:  
15 sedentary (<100 counts), light (100–1951 counts), moderate (1952–5724), vigorous (5725–  
16 9498), and very vigorous (>9498)<sup>18</sup>, as previously used in pregnant women<sup>19</sup>. Non-wear time  
17 was defined as a period of zero counts for  $\geq$  60 consecutive minutes, admitting a maximum of  
18 two consecutive minutes between 1 and 100 counts/min. When a third observation was  
19 between 1 and 100 counts or one observation was more than 100 counts, the non-wear period  
20 was ended. Bouts of moderate-to-vigorous physical activity (MVPA) was defined as a  
21 minimum of 10 consecutive minutes above 1952 counts and ended with more than two  
22 consecutive records below this threshold.  
23  
24  
25  
26  
27  
28  
29  
30  
31  
32  
33  
34  
35  
36  
37  
38  
39  
40  
41  
42  
43

#### 44 **Patient and Public Involvement**

45 Patients and public were not involved in the design and conduct of this study. The results will  
46 not be disseminated to study participants.  
47  
48  
49  
50

#### 51 **Statistical analysis**

52 Means and standard deviations, as well as percentages, were computerized for variables of  
53  
54  
55  
56  
57  
58  
59  
60

1  
2  
3 interest. Student t-test was used to compare socio-demographic and anthropometric  
4 characteristics between SP and FT women. For categorical variables, the  $\chi$  square test was  
5 used. Analysis of variance (ANOVA) for repeated measures was used to assess the evolution  
6 of the severity of PPGP, anxiety levels, physical limitations and physical activity behaviors  
7 throughout pregnancy in SP and FT women. To test whether the severity of PPGP was  
8 correlated to the levels of anxiety, physical limitations and physical activity behaviors at each  
9 trimester of pregnancy, Pearson's correlation analyses were used. Finally, exploratory logistic  
10 regression analyses were conducted to identify potential predictors of PPGP in TR3.  
11 Statistical analyses were performed by using the SAS software (version 9.4) and the level of  
12 significance was set to  $p\text{-value} \leq 0.05$ .  
13  
14  
15  
16  
17  
18  
19  
20  
21  
22  
23  
24  
25

## 26 RESULTS

27  
28 Between October 2015 and May 2016, the study was presented to 117 eligible pregnant  
29 women, among which 62 women accepted to participate. Three women (1 in SP group and 2  
30 in FT group) were excluded due to several missing data, leaving 59 women (33 SP and 26  
31 FT) for the statistical analyses.  
32  
33  
34  
35  
36

37 The characteristics of pregnant women are presented in **Table 1**. No significant difference in  
38 socio-demographic and pre-pregnancy anthropometric characteristics was found between the  
39 groups ( $p > 0.05$ ). Women were on average in their early thirties and approximately half of  
40 them were nulliparous. More than half were of normal weight pre-pregnancy (BMI 18.5-24.9  
41 kg/m<sup>2</sup>) and had a university degree. Women's PGP history, related or not to a previous  
42 pregnancy, was also similar between the groups, with approximately 50% of the women  
43 reporting a history of PGP (**Table 1**). Finally, the prevalence and severity of PPGP, anxiety  
44 and physical activity levels were not different between SP and FT pregnant women at study  
45 entry (**Table 1**). Data showed that on average, women considered PPGP as uncomfortable  
46  
47  
48  
49  
50  
51  
52  
53  
54  
55  
56  
57  
58  
59  
60

(4/10) and were slightly anxious (35/80). Moreover, based on daily steps and physical activity recommendations<sup>20,21</sup>, our population was considered inactive.

The prevalence of PPGP was similar in both groups during each trimester of pregnancy (TR1:  $\chi^2 = 2.19$ ,  $p=0.33$ ; TR2:  $\chi^2 = 2.13$ ,  $p=0.33$ ; TR3:  $\chi^2 = 0.01$ ,  $p=0.92$ ); the pooled prevalence of PPGP increased from 42% during TR1 to 65% during TR2 to 68% during TR3 ( $\chi^2 = 8.45$ ;  $p=0.01$ ) (**Fig 1**). Among women presenting PPGP at one time point during pregnancy ( $n=44$ , 26 SP and 18 FT), pain severity significantly increased over the course of pregnancy in both groups (time effect,  $p<0.0001$ . **Fig 2**), with pain severity being significantly higher during TR2 and TR3 compared to TR1. Trait anxiety decreased over the course of pregnancy in both groups (time effect,  $p<0.03$ . **Fig 3A**), with lower levels during TR2 compared to TR1, whereas state anxiety did not significantly change (**Fig 3B**). Finally, physical limitations associated with PPGP increased (time effect,  $p<0.0001$ . **Fig 4A**) whereas daily steps decreased over the course of pregnancy in both groups (time effect,  $p<0.0001$ . **Fig 4B**). The only time by group interaction effect was found for daily MVPA which decreased only in SP women (time effect,  $p<0.0001$ ; time\*group interaction effect,  $p=0.04$ . **Fig 4C**).

Since changes in the severity of PPGP, levels of anxiety, physical limitations and physical activity behaviors were similar between the groups, result from SP and FT women were pooled in the correlation analyses. Among women who presented PPGP, no correlation was found during TR1 between the severity of PPGP and anxiety or physical activity levels. During TR2, the severity of PPGP was positively correlated with physical limitations ( $r=0.51$ ,  $p=0.001$ , **Fig 5A**) but negatively with daily steps ( $r=-0.39$ ,  $p=0.03$ , **Fig 5B**). No correlation was found with daily MVPA (**Fig 5C**). During TR3, we found a positive correlation between the severity of PPGP and physical limitations ( $r=0.55$ ,  $p=0.0002$ , **Fig 6A**) but a negative correlation with daily MVPA ( $r=-0.41$ ,  $p=0.02$ , **Fig 6B**). No correlation was found with daily steps (**Fig 6C**).

1  
2  
3 Finally, exploratory logistic analyses revealed that among the potential predictors of PPGP  
4 during TR3 (mode of conception, parity, pre-pregnancy BMI, PPGP, anxiety and physical  
5 activity levels during TR1, and weight gain until TR3), PPGP during TR1 was the only  
6  
7 significant predictor (odds ratio: 7.33, 95% confidence interval 1.82–29.48,  $p=0.005$ ).  
8  
9  
10  
11  
12  
13  
14  
15  
16  
17  
18  
19  
20  
21  
22  
23  
24  
25  
26  
27  
28  
29  
30  
31  
32  
33  
34  
35  
36  
37  
38  
39  
40  
41  
42  
43  
44  
45  
46  
47  
48  
49  
50  
51  
52  
53  
54  
55  
56  
57  
58  
59  
60

For peer review only

## DISCUSSION

To the best of our knowledge, this is the first cohort study assessing the course of PPGP prevalence and severity in pregnant women who conceived naturally and after fertility treatments, and possible association with anxiety levels and physical activity behaviors. Overall, our primary results showed no relationship between the mode of conception and PPGP prevalence and severity, or anxiety levels. As expected, the prevalence and severity of PPGP increased over the course of pregnancy, whereas anxiety levels decreased from early to mid-pregnancy and were not correlated to the severity of PPGP.

Only one study examined the evolution of the prevalence and severity of PPGP according to the mode of conception. This study was conducted in 31 women who conceived after IVF and 200 women who conceived spontaneously and assessed PPGP at 12, 24 and 34 weeks of pregnancy<sup>9</sup>. The authors found an increase in PPGP prevalence and severity over the course of pregnancy in all women, as we and other authors did<sup>22</sup>. However, they reported a two times higher rate of PPGP in early and late pregnancy in women who achieved a pregnancy after IVF compared to those who achieved a pregnancy naturally but similar severity of PPGP<sup>9</sup>. Our hypothesis was that higher anxiety levels reported in women who conceived after fertility treatments<sup>10</sup> would contribute to higher PPGP prevalence and severity in this population of pregnant women. However, we did not find any difference in anxiety levels between women who conceived after fertility treatments and those who conceived naturally. Several reasons may explain our result. First, the majority of women included in our sample conceived after ovarian stimulation (OS, n=7) or intrauterine insemination (IUI, n=12), whereas the majority of studies included in Gourounti's review reporting higher anxiety in women who conceived following fertility treatments were conducted in the context of IVF<sup>10</sup>. It is very likely that OS and IUI generate less anxiety than IVF treatments, which might explain why we found no differences in anxiety levels in our sample. Second, the

1  
2  
3 questionnaire we used evaluated state and trait anxiety whereas Gourounti's review reported  
4 on pregnancy-specific anxiety<sup>10</sup>. It is possible that fertility treatments specifically affect  
5 anxiety related to pregnancy but not general anxiety, in which case the questionnaire we used  
6 may not have been specific enough to identify differences in anxiety between women who  
7 conceived after fertility treatment and those who conceived naturally.  
8  
9

10  
11  
12  
13 When examining anxiety levels over the course of pregnancy, we found a U-shaped curve,  
14 with a significant decrease in anxiety from TR1 to TR2 and a non-significant trend toward an  
15 increase from TR2 to TR3. These findings are similar to those of previous studies<sup>23,24</sup>. In  
16 contrast, whereas some studies reported higher anxiety in pregnant women with PPGP<sup>11,25</sup>,  
17 we found no correlation between anxiety levels and PPGP severity. Our findings suggest that  
18 in our sample, anxiety and PPGP were two independent phenomena.  
19  
20  
21  
22

23  
24  
25  
26 Likewise, our secondary results showed no relationship between the mode of conception and  
27 physical limitations and physical activity behaviors, except for MVPA during TR3. The  
28 decrease in MVPA observed only in women who conceived naturally needs further  
29 investigation. Similarly to previous studies<sup>26-29</sup>, we found that with advancing pregnancy,  
30 physical limitations increased<sup>28-30</sup> and physical activity behaviors decreased<sup>26,27,31</sup>. Our data  
31 further showed that the greater PPGP severity the greater physical limitation and lower  
32 physical activity levels in mid- and late pregnancy. These results are also in accordance with  
33 previous studies reporting decreased physical activity levels as physical limitations and low  
34 back pain increase with advancing pregnancy<sup>28,32</sup>.  
35  
36  
37  
38  
39  
40  
41  
42  
43  
44  
45

46  
47 Despite the high prevalence of PPGP, little is known about the risk factors for PPGP. Clinical  
48 management would benefit from an early identification of women at risk of developing PPGP  
49 later in pregnancy. Exploratory univariate logistic regression analyses were carried out and  
50 revealed that the presence of PPGP during TR1 was a significant predictor of PPGP in TR3.  
51  
52  
53  
54 This finding is in accordance with those of Robinson et al.<sup>29</sup> who reported an association  
55  
56  
57  
58  
59  
60

1  
2  
3 between pain and positive pain provocation test in early pregnancy and disability and pain  
4  
5 intensity in late pregnancy.  
6  
7

### 8 **Limitations**

9  
10 The current study has a few limitations that should be acknowledged. First, as previously  
11 mentioned, our sample was heterogeneous with regards to fertility treatments used to achieve  
12 a pregnancy, with the majority of women having conceived after OS or IUI. This may have  
13 limited our ability to find higher PPGP prevalence and anxiety levels in women who  
14 conceived after fertility treatments. Third, general anxiety was assessed whereas the type of  
15 anxiety that may be influenced by the mode of conception may be more specific to pregnancy.  
16  
17 We had missing physical activity data, suggesting that several women did not wear the  
18 accelerometer for at least 10 hours per day for four days. Some women with PPGP reported  
19 discomfort when wearing the accelerometer, suggesting that we may have under-evaluated  
20 physical activity levels. Finally, more than half of the women we recruited had a university  
21 degree. This suggests a possible recruitment bias and limits the generalizability of our results  
22 to a wider population of pregnant women. However, the strength of our study is its  
23 longitudinal design that allowed us to examine the evolution of several maternal health-  
24 related factors that are known to change over the course of pregnancy. Moreover, our study  
25 clarifies the relationship between PPGP severity and physical activity behaviors using  
26 accelerometers, which is an objective measurement tool frequently used in pregnant women  
27 to assess physical activity levels and sedentary behaviors <sup>19</sup>.  
28  
29  
30  
31  
32  
33  
34  
35  
36  
37  
38  
39  
40  
41  
42  
43  
44  
45  
46  
47  
48  
49  
50  
51  
52  
53  
54  
55  
56  
57  
58  
59  
60

## CONCLUSION

In conclusion, our findings suggest that maternal health-related factors, such as PPGP, anxiety and physical activity behaviors, are not different in women who conceived after fertility treatments and those who conceived spontaneously. The lack of correlation between PPGP severity and anxiety levels suggests that they are two independent phenomena. The increase in PPGP severity and physical limitations, and decrease in physical activity behaviors with advancing gestation, and the fact that the more severe PPGP the greater physical limitations and physical inactivity in mid- and late pregnancy underlie the importance of PPGP management to allow pregnant women performing their daily activities.



1  
2  
3 **Acknowledgments:** The authors would like to acknowledge and thank Sophie Drouin, the  
4 coordinator of the fertility clinic, as well as the medical team who assisted with the  
5 recruitment, and all the women who participated to the project.  
6  
7  
8  
9

10  
11 **Funding:** This study was funded by a start-up grant from the Univeristé du Québec à Trois-  
12 Rivières (Institutional funds for research).  
13  
14  
15

16  
17  
18 **Declaration of conflicting interests:** The authors declare that there is no conflict of interest.  
19  
20  
21

22 **Author Contributions:** SMR, MD, VB contributed to the study concept and design; EL and  
23 ASStL acquired the data; SMR, MD, EL performed the statistical analysis and interpreted the  
24 data; EL and SMR drafted the manuscript; MD, ASStL and VB critically reviewed the  
25 manuscript for important intellectual content. All authors read and approved the final  
26 manuscript.  
27  
28  
29  
30  
31  
32  
33  
34

35 **Competing interests:** None declared.  
36  
37  
38

39 **Ethics approval:** The study was approved by the local Research Ethics Committees (CER-  
40 2015-003 and CER-15-214-07.10)  
41  
42  
43  
44

45  
46 **Data sharing statement:** No additional data are available.  
47  
48  
49  
50  
51  
52  
53  
54  
55  
56  
57  
58  
59  
60

## References

1. Vleeming A, Albert HB, Ostgaard HC, Sturesson B, Stuge B. European guidelines for the diagnosis and treatment of pelvic girdle pain. *Eur Spine J*. 2008;17(6):794-819.
2. Kanakaris NK, Roberts CS, Giannoudis PV. Pregnancy-related pelvic girdle pain: an update. *BMC Med*. 2011;9:15.
3. Olsson C, Nilsson-Wikmar L. Health-related quality of life and physical ability among pregnant women with and without back pain in late pregnancy. *Acta Obstet Gynecol Scand*. 2004;83(4):351-357.
4. Gutke A, Ostgaard HC, Oberg B. Pelvic girdle pain and lumbar pain in pregnancy: a cohort study of the consequences in terms of health and functioning. *Spine (Phila Pa 1976)*. 2006;31(5):E149-155.
5. Mogren I. Perceived health, sick leave, psychosocial situation, and sexual life in women with low-back pain and pelvic pain during pregnancy. *Acta Obstet Gynecol Scand*. 2006;85(6):647-656.
6. Moore K, Dumas GA, Reid JG. Postural changes associated with pregnancy and their relationship with low-back pain. *Clin Biomech (Bristol, Avon)*. 1990;5(3):169-174.
7. Owe KM, Nystad W, Bo K. Correlates of regular exercise during pregnancy: the Norwegian Mother and Child Cohort Study. *Scand J Med Sci Sports*. 2009;19(5):637-645.
8. Mudd LM, Owe KM, Mottola MF, Pivarnik JM. Health benefits of physical activity during pregnancy: an international perspective. *Med Sci Sports Exerc*. 2013;45(2):268-277.
9. Kristiansson P, Nilsson-Wikmar L, von Schoultz B, Svardsudd K, Wramsby H. Back pain in in-vitro fertilized and spontaneous pregnancies. *Hum Reprod*. 1998;13(11):3233-3238.

10. Gourounti K. Psychological stress and adjustment in pregnancy following assisted reproductive technology and spontaneous conception: A systematic review. *Women Health*. 2015:1-21.
11. Kovacs FM, Garcia E, Royuela A, Gonzalez L, Abraira V. Prevalence and factors associated with low back pain and pelvic girdle pain during pregnancy: a multicenter study conducted in the Spanish National Health Service. *Spine (Phila Pa 1976)*. 2012;37(17):1516-1533.
12. Ostelo RW, Deyo RA, Stratford P, et al. Interpreting change scores for pain and functional status in low back pain: towards international consensus regarding minimal important change. *Spine (Phila Pa 1976)*. 2008;33(1):90-94.
13. Gauthier J, Bouchard S. Adaptation canadienne-française de la forme révisée du State-Trait Anxiety Inventory de Spielberg. *Canadian Journal of Behavioral Sciences*. 1990;25 (4):559-589.
14. Spielberger CD. *Manual for the State-Trait Anxiety Inventory (Form Y)*. Palo Alto: Consulting Psychologist Press; 1983.
15. Girard MP, Marchand AA, Stuge B, Ruchat SM, Descarreaux M. Cross-cultural Adaptation of the Pelvic Girdle Questionnaire for the French-Canadian Population. *J Manipulative Physiol Ther*. 2016;39(7):494-499.
16. Stuge B, Garratt A, Krogstad Jenssen H, Grotle M. The pelvic girdle questionnaire: a condition-specific instrument for assessing activity limitations and symptoms in people with pelvic girdle pain. *Phys Ther*. 2011;91(7):1096-1108.
17. Colley RC, Garriguet D, Janssen I, Craig CL, Clarke J, Tremblay MS. Activité physique des adultes au Canada: résultats d'accélérométrie de l'Enquête Canadienne sur les mesures de la santé de 2007-2009. *Statistique Canada Rapports sur la santé*. 2011.

18. Freedson PS, Melanson E, Sirard J. Calibration of the Computer Science and Applications, Inc. accelerometer. *Med Sci Sports Exerc.* 1998;30(5):777-781.
19. Harrison CL, Thompson RG, Teede HJ, Lombard CB. Measuring physical activity during pregnancy. *Int J Behav Nutr Phys Act.* 2011;8:19.
20. Tudor-Locke C, Bassett DR, Jr. How many steps/day are enough? Preliminary pedometer indices for public health. *Sports Med.* 2004;34(1):1-8.
21. Evenson KR, Mottola MF, Owe KM, Rousham EK, Brown WJ. Summary of international guidelines for physical activity after pregnancy. *Obstet Gynecol Surv.* 2014;69(7):407-414.
22. Kristiansson P, Svardsudd K, von Schoultz B. Back pain during pregnancy: a prospective study. *Spine (Phila Pa 1976).* 1996;21(6):702-709.
23. Lee AM, Lam SK, Sze Mun Lau SM, Chong CS, Chui HW, Fong DY. Prevalence, course, and risk factors for antenatal anxiety and depression. *Obstet Gynecol.* 2007;110(5):1102-1112.
24. Teixeira C, Figueiredo B, Conde A, Pacheco A, Costa R. Anxiety and depression during pregnancy in women and men. *J Affect Disord.* 2009;119(1-3):142-148.
25. Elden H, Gutke A, Kjellby-Wendt G, Fagevik-Olsen M, Ostgaard HC. Predictors and consequences of long-term pregnancy-related pelvic girdle pain: a longitudinal follow-up study. *BMC Musculoskelet Disord.* 2016;17:276.
26. Evenson KR, Wen F. Prevalence and correlates of objectively measured physical activity and sedentary behavior among US pregnant women. *Prev Med.* 2011;53(1-2):39-43.
27. Rousham EK, Clarke PE, Gross H. Significant changes in physical activity among pregnant women in the UK as assessed by accelerometry and self-reported activity. *Eur J Clin Nutr.* 2006;60(3):393-400.

- 1  
2  
3 28. Cramp AG, Bray SR. A prospective examination of exercise and barrier self-efficacy  
4 to engage in leisure-time physical activity during pregnancy. *Ann Behav Med.*  
5 2009;37(3):325-334.  
6  
7  
8  
9 29. Robinson HS, Veierod MB, Mengshoel AM, Vollestad NK. Pelvic girdle pain--  
10 associations between risk factors in early pregnancy and disability or pain intensity in  
11 late pregnancy: a prospective cohort study. *BMC Musculoskelet Disord.* 2010;11:91.  
12  
13  
14 30. Chang HY, Lai YH, Jensen MP, et al. Factors associated with low back pain changes  
15 during the third trimester of pregnancy. *J Adv Nurs.* 2014;70(5):1054-1064.  
16  
17  
18 31. Downs DS, LeMasurier GC, DiNallo JM. Baby steps: pedometer-determined and self-  
19 reported leisure-time exercise behaviors of pregnant women. *J Phys Act Health.*  
20 2009;6(1):63-72.  
21  
22  
23 32. Poston L, Briley AL, Barr S, et al. Developing a complex intervention for diet and  
24 activity behaviour change in obese pregnant women (the UPBEAT trial); assessment  
25 of behavioural change and process evaluation in a pilot randomised controlled trial.  
26 *BMC Pregnancy Childbirth.* 2013;13:148.  
27  
28  
29  
30  
31  
32  
33  
34  
35  
36  
37  
38  
39  
40  
41  
42  
43  
44  
45  
46  
47  
48  
49  
50  
51  
52  
53  
54  
55  
56  
57  
58  
59  
60

**Table 1:** Baseline characteristics of the 59 pregnant women included in study.

| Variables                                  | FT<br>(n=26)<br>Means $\pm$ SD | SP<br>(n=33)<br>Means $\pm$ SD | P values |
|--------------------------------------------|--------------------------------|--------------------------------|----------|
| Fertility treatments                       | OS=7<br>IUI=12<br>IVF=7        | -                              |          |
| Age (years)                                | 32.2 $\pm$ 3.6                 | 30.9 $\pm$ 4.2                 | 0.23     |
| Parity                                     | 0.4 $\pm$ 0.6                  | 0.6 $\pm$ 0.6                  | 0.36     |
| 0 (n)                                      | 57.7% (15)                     | 45.5% (15)                     | 0.35     |
| $\geq$ 1 (n)                               | 42.3% (11)                     | 54.6% (18)                     |          |
| Pre-pregnancy BMI (kg/cm <sup>2</sup> )    | 26.3 $\pm$ 7.3                 | 25.2 $\pm$ 6.6                 | 0.54     |
| Underweight <18.4                          | 0% (0)                         | 3.1% (1)                       | 0.81     |
| Normal weight (18.5-24.9)                  | 60.0 (15)                      | 62.5% (20)                     |          |
| Overweight (25.0-29.9)                     | 20.0 (5)                       | 18.8% (6)                      |          |
| Obese $\geq$ 30.0                          | 20.0%(5)                       | 15.6% (5)                      |          |
| Education levels                           |                                |                                |          |
| Non-university degree                      | 42.3% (11)                     | 33.3% (11)                     | 0.48     |
| University degree                          | 57.7% (15)                     | 66.7% (22)                     |          |
| PGP history (yes) <sup>1</sup>             | 46.2% (12)                     | 54.6% (18)                     | 0.52     |
| Prevalence of PGP over the last week (yes) | 34.6% (9)                      | 48.5% (16)                     | 0.33     |
| Severity of PGP over the last week         | 2.9 $\pm$ 1.9                  | 4.1 $\pm$ 2.3                  | 0.18     |
| State anxiety                              | 37.4 $\pm$ 11.6                | 34.2 $\pm$ 9.1                 | 0.28     |
| Trait anxiety                              | 39.8 $\pm$ 10.0                | 37.1 $\pm$ 9.4                 | 0.26     |
| Daily steps                                | 5328 $\pm$ 1551                | 5569 $\pm$ 1552                | 0.80     |
| Daily MVPA (min)                           | 16.3 $\pm$ 10.0                | 17.4 $\pm$ 13.2                | 0.97     |

FT: fertility treatment; SP: spontaneous conception; OS: ovarian stimulation; IUI: intrauterine insemination; IVF: *in vitro* fertilization; BMI : body mass index; PGP : pelvic girdle pain; MVPA: moderate-to-vigorous physical activity

<sup>1</sup> PGP history includes history of pregnancy-related PGP and PGP not related to pregnancy

Missing data: pre-pregnancy BMI: 1 FT, 1 SP; state and trait anxiety : 1 SP; accelerometer data: 4 SP; 6 FT

1  
2  
3 **Figure legend**  
4  
5  
6

7 **Figure 1:** Prevalence of PPGP in FT and SP pregnant women over the course of pregnancy.  
8  
9

10  
11 **Figure 2:** Evolution of PPGP severity in FT and SP pregnant women over the course of  
12 pregnancy.  
13  
14

15  
16  
17 **Figure 3:** Evolution of (A) trait anxiety and (B) state anxiety in FT and SP pregnant women  
18 over the course of pregnancy.  
19  
20

21  
22  
23 **Figure 4:** Evolution of (A) physical limitations, (B) daily step counts an (C) daily moderate-  
24 to-vigorous physical activity in FT and SP pregnant women over the course of pregnancy.  
25  
26  
27

28  
29  
30 **Figure 5:** Correlation between the severity of PPGP and (A) physical limitations, (B) daily  
31 step counts and (C) daily moderate-to-vigorous physical activity at TR2.  
32  
33

34  
35  
36 **Figure 6:** Correlation between the severity of PPGP and (A) physical limitations, (B) daily  
37 step counts and (C) daily moderate-to-vigorous physical activity at TR3.  
38  
39  
40  
41  
42  
43  
44  
45  
46  
47  
48  
49  
50  
51  
52  
53  
54  
55  
56  
57  
58  
59  
60

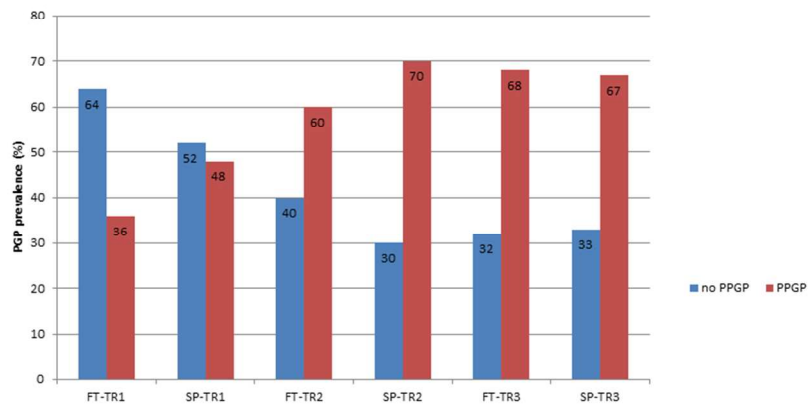

Figure 1: Prevalence of PPGP in FT and SP pregnant women over the course of pregnancy.

254x190mm (96 x 96 DPI)



1  
2  
3  
4  
5  
6  
7  
8  
9  
10  
11  
12  
13  
14  
15  
16  
17  
18  
19  
20  
21  
22  
23  
24  
25  
26  
27  
28  
29  
30  
31  
32  
33  
34  
35  
36  
37  
38  
39  
40  
41  
42  
43  
44  
45  
46  
47  
48  
49  
50  
51  
52  
53  
54  
55  
56  
57  
58  
59  
60

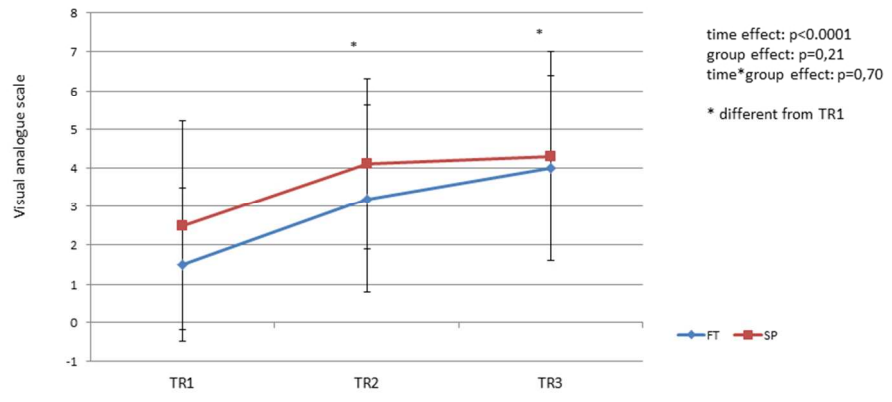

Figure 2: Evolution of PPGP severity in FT and SP pregnant women over the course of pregnancy.

254x190mm (96 x 96 DPI)

1  
2  
3  
4  
5  
6  
7  
8  
9  
10  
11  
12  
13  
14  
15  
16  
17  
18  
19  
20  
21  
22  
23  
24  
25  
26  
27  
28  
29  
30  
31  
32  
33  
34  
35  
36  
37  
38  
39  
40  
41  
42  
43  
44  
45  
46  
47  
48  
49  
50  
51  
52  
53  
54  
55  
56  
57  
58  
59  
60

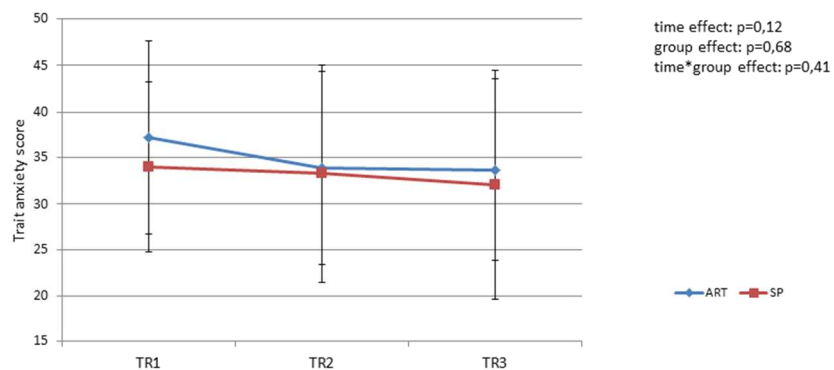

Figure 3: Evolution of trait anxiety in FT and SP pregnant women over the course of pregnancy.

254x190mm (96 x 96 DPI)

1  
2  
3  
4  
5  
6  
7  
8  
9  
10  
11  
12  
13  
14  
15  
16  
17  
18  
19  
20  
21  
22  
23  
24  
25  
26  
27  
28  
29  
30  
31  
32  
33  
34  
35  
36  
37  
38  
39  
40  
41  
42  
43  
44  
45  
46  
47  
48  
49  
50  
51  
52  
53  
54  
55  
56  
57  
58  
59  
60

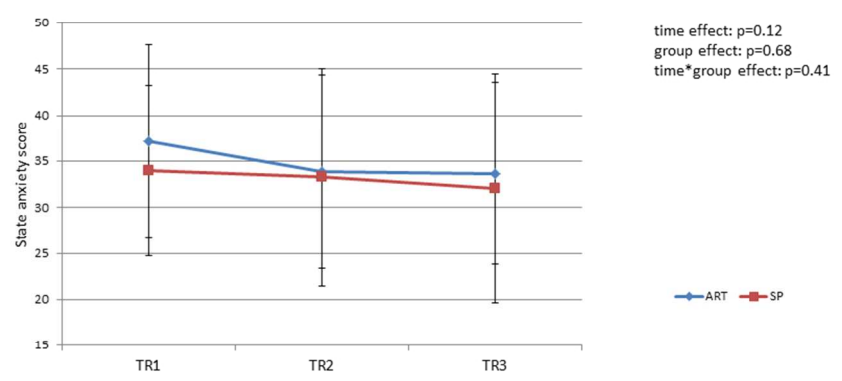

Figure 3: Evolution of state anxiety in FT and SP pregnant women over the course of pregnancy.

254x190mm (96 x 96 DPI)

1  
2  
3  
4  
5  
6  
7  
8  
9  
10  
11  
12  
13  
14  
15  
16  
17  
18  
19  
20  
21  
22  
23  
24  
25  
26  
27  
28  
29  
30  
31  
32  
33  
34  
35  
36  
37  
38  
39  
40  
41  
42  
43  
44  
45  
46  
47  
48  
49  
50  
51  
52  
53  
54  
55  
56  
57  
58  
59  
60

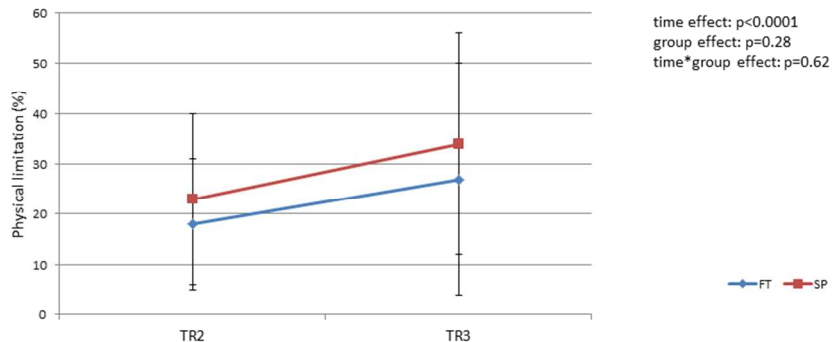

Figure 4: Evolution of physical limitations in FT and SP pregnant women over the course of pregnancy.

254x190mm (96 x 96 DPI)

1  
2  
3  
4  
5  
6  
7  
8  
9  
10  
11  
12  
13  
14  
15  
16  
17  
18  
19  
20  
21  
22  
23  
24  
25  
26  
27  
28  
29  
30  
31  
32  
33  
34  
35  
36  
37  
38  
39  
40  
41  
42  
43  
44  
45  
46  
47  
48  
49  
50  
51  
52  
53  
54  
55  
56  
57  
58  
59  
60

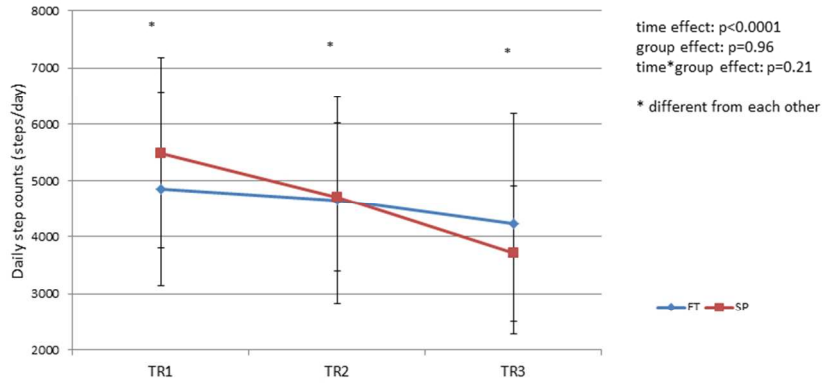

Figure 4: Evolution of daily step counts in FT and SP pregnant women over the course of pregnancy.

254x190mm (96 x 96 DPI)

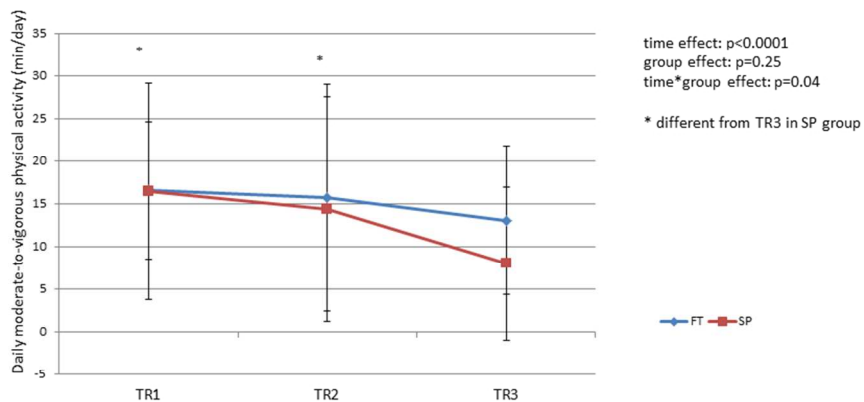

Figure 4: Evolution of daily moderate-to-vigorous physical activity in FT and SP pregnant women over the course of pregnancy.

254x190mm (96 x 96 DPI)

1  
2  
3  
4  
5  
6  
7  
8  
9  
10  
11  
12  
13  
14  
15  
16  
17  
18  
19  
20  
21  
22  
23  
24  
25  
26  
27  
28  
29  
30  
31  
32  
33  
34  
35  
36  
37  
38  
39  
40  
41  
42  
43  
44  
45  
46  
47  
48  
49  
50  
51  
52  
53  
54  
55  
56  
57  
58  
59  
60

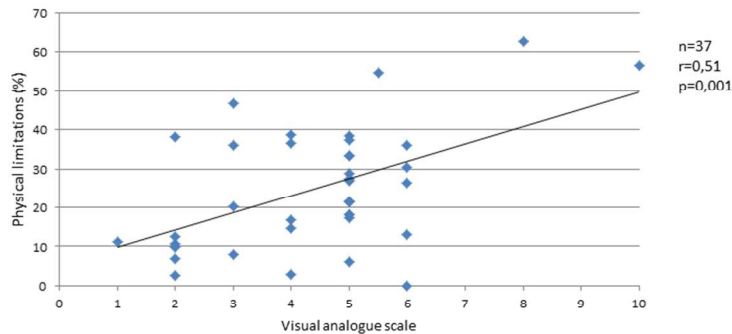

Figure 5: Correlation between the severity of PPGP and physical limitations at TR2.

254x190mm (96 x 96 DPI)

1  
2  
3  
4  
5  
6  
7  
8  
9  
10  
11  
12  
13  
14  
15  
16  
17  
18  
19  
20  
21  
22  
23  
24  
25  
26  
27  
28  
29  
30  
31  
32  
33  
34  
35  
36  
37  
38  
39  
40  
41  
42  
43  
44  
45  
46  
47  
48  
49  
50  
51  
52  
53  
54  
55  
56  
57  
58  
59  
60

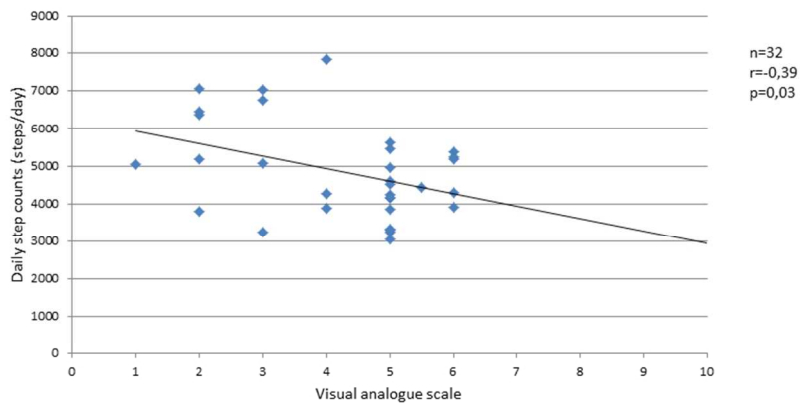

Figure 5: Correlation between the severity of PPGP and daily step counts at TR2.

254x190mm (96 x 96 DPI)

Peer Review Only



1  
2  
3  
4  
5  
6  
7  
8  
9  
10  
11  
12  
13  
14  
15  
16  
17  
18  
19  
20  
21  
22  
23  
24  
25  
26  
27  
28  
29  
30  
31  
32  
33  
34  
35  
36  
37  
38  
39  
40  
41  
42  
43  
44  
45  
46  
47  
48  
49  
50  
51  
52  
53  
54  
55  
56  
57  
58  
59  
60

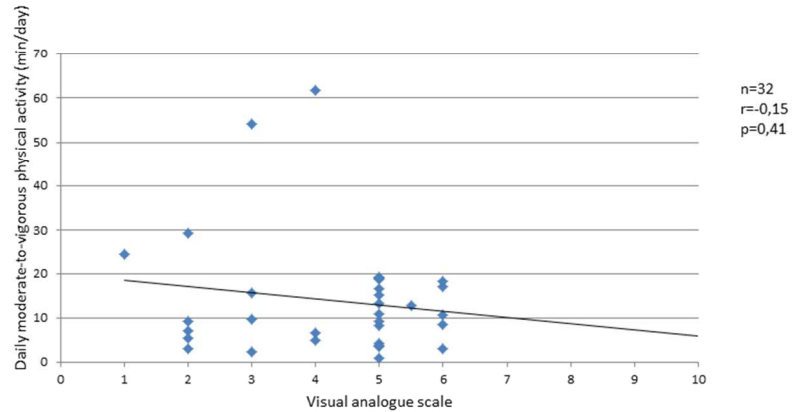

Figure 5: Correlation between the severity of PPGP and daily moderate-to-vigorous physical activity at TR2.

254x190mm (96 x 96 DPI)

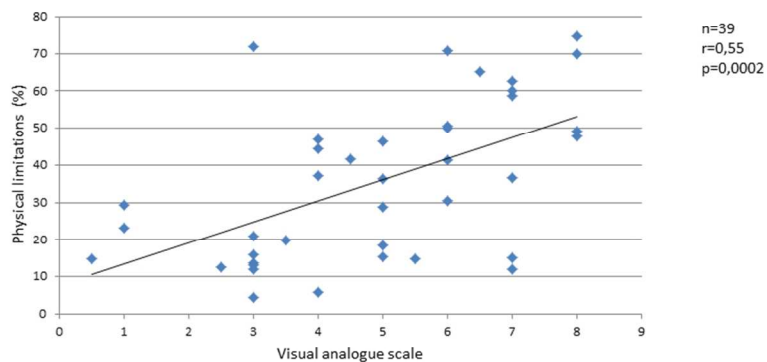

Figure 6: Correlation between the severity of PPGP and physical limitations at TR3.

254x190mm (96 x 96 DPI)

1  
2  
3  
4  
5  
6  
7  
8  
9  
10  
11  
12  
13  
14  
15  
16  
17  
18  
19  
20  
21  
22  
23  
24  
25  
26  
27  
28  
29  
30  
31  
32  
33  
34  
35  
36  
37  
38  
39  
40  
41  
42  
43  
44  
45  
46  
47  
48  
49  
50  
51  
52  
53  
54  
55  
56  
57  
58  
59  
60

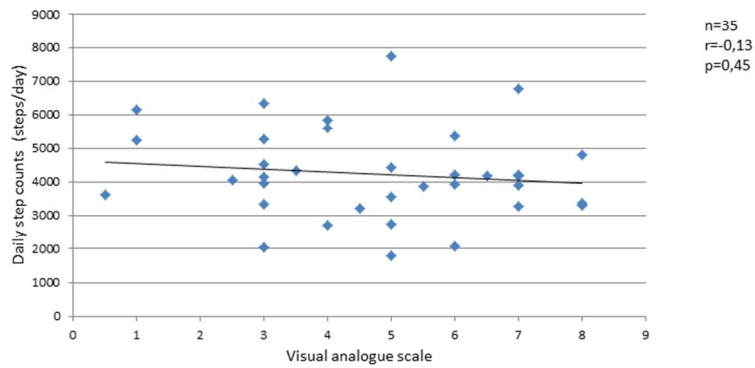

Figure 6: Correlation between the severity of PPGP and daily step counts at TR3.

254x190mm (96 x 96 DPI)

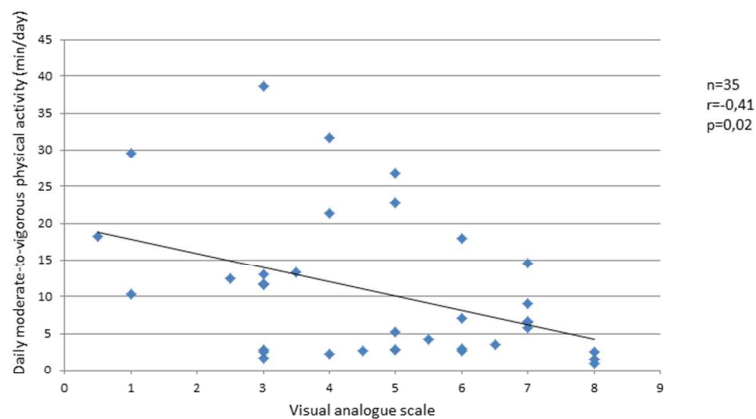

Figure 6: Correlation between the severity of PPGP and daily moderate-to-vigorous physical activity at TR3.

254x190mm (96 x 96 DPI)

**STROBE 2007 (v4) Statement—Checklist of items that should be included in reports of *cohort studies***

| Section/Topic                | Item # | Recommendation                                                                                                                                                                       | Reported on page # |
|------------------------------|--------|--------------------------------------------------------------------------------------------------------------------------------------------------------------------------------------|--------------------|
| <b>Title and abstract</b>    | 1      | (a) Indicate the study's design with a commonly used term in the title or the abstract                                                                                               | 1                  |
|                              |        | (b) Provide in the abstract an informative and balanced summary of what was done and what was found                                                                                  | 2                  |
| <b>Introduction</b>          |        |                                                                                                                                                                                      |                    |
| Background/rationale         | 2      | Explain the scientific background and rationale for the investigation being reported                                                                                                 | 4-5                |
| Objectives                   | 3      | State specific objectives, including any prespecified hypotheses                                                                                                                     | 5                  |
| <b>Methods</b>               |        |                                                                                                                                                                                      |                    |
| Study design                 | 4      | Present key elements of study design early in the paper                                                                                                                              | 5                  |
| Setting                      | 5      | Describe the setting, locations, and relevant dates, including periods of recruitment, exposure, follow-up, and data collection                                                      | 5-6                |
| Participants                 | 6      | (a) Give the eligibility criteria, and the sources and methods of selection of participants. Describe methods of follow-up                                                           | 5                  |
|                              |        | (b) For matched studies, give matching criteria and number of exposed and unexposed                                                                                                  | na                 |
| Variables                    | 7      | Clearly define all outcomes, exposures, predictors, potential confounders, and effect modifiers. Give diagnostic criteria, if applicable                                             | 6-7                |
| Data sources/<br>measurement | 8*     | For each variable of interest, give sources of data and details of methods of assessment (measurement). Describe comparability of assessment methods if there is more than one group | 6-7                |
| Bias                         | 9      | Describe any efforts to address potential sources of bias                                                                                                                            | -                  |
| Study size                   | 10     | Explain how the study size was arrived at                                                                                                                                            | -                  |
| Quantitative variables       | 11     | Explain how quantitative variables were handled in the analyses. If applicable, describe which groupings were chosen and why                                                         | 6-7                |
| Statistical methods          | 12     | (a) Describe all statistical methods, including those used to control for confounding                                                                                                | 7                  |
|                              |        | (b) Describe any methods used to examine subgroups and interactions                                                                                                                  | 7                  |
|                              |        | (c) Explain how missing data were addressed                                                                                                                                          | na                 |
|                              |        | (d) If applicable, explain how loss to follow-up was addressed                                                                                                                       | na                 |
|                              |        | (e) Describe any sensitivity analyses                                                                                                                                                | na                 |
| <b>Results</b>               |        |                                                                                                                                                                                      |                    |

|                          |     |                                                                                                                                                                                                              |                      |
|--------------------------|-----|--------------------------------------------------------------------------------------------------------------------------------------------------------------------------------------------------------------|----------------------|
| Participants             | 13* | (a) Report numbers of individuals at each stage of study—eg numbers potentially eligible, examined for eligibility, confirmed eligible, included in the study, completing follow-up, and analysed            | 8                    |
|                          |     | (b) Give reasons for non-participation at each stage                                                                                                                                                         | 8                    |
|                          |     | (c) Consider use of a flow diagram                                                                                                                                                                           | -                    |
| Descriptive data         | 14* | (a) Give characteristics of study participants (eg demographic, clinical, social) and information on exposures and potential confounders                                                                     | 8, 19 (table 1)      |
|                          |     | (b) Indicate number of participants with missing data for each variable of interest                                                                                                                          | na                   |
|                          |     | (c) Summarise follow-up time (eg, average and total amount)                                                                                                                                                  | 6                    |
| Outcome data             | 15* | Report numbers of outcome events or <b>summary measures over time</b>                                                                                                                                        | 8-9, 20-28 (figures) |
| Main results             | 16  | (a) Give unadjusted estimates and, if applicable, confounder-adjusted estimates and their precision (eg, 95% confidence interval). Make clear which confounders were adjusted for and why they were included | na                   |
|                          |     | (b) Report category boundaries when continuous variables were categorized                                                                                                                                    | na                   |
|                          |     | (c) If relevant, consider translating estimates of relative risk into absolute risk for a meaningful time period                                                                                             | na                   |
| Other analyses           | 17  | Report other analyses done—eg analyses of subgroups and interactions, and sensitivity analyses                                                                                                               | na                   |
| <b>Discussion</b>        |     |                                                                                                                                                                                                              |                      |
| Key results              | 18  | Summarise key results with reference to study objectives                                                                                                                                                     | 10-11                |
| <b>Limitations</b>       |     |                                                                                                                                                                                                              |                      |
| Interpretation           | 20  | Give a cautious overall interpretation of results considering objectives, limitations, multiplicity of analyses, results from similar studies, and other relevant evidence                                   | 12                   |
| Generalisability         | 21  | Discuss the generalisability (external validity) of the study results                                                                                                                                        | 12                   |
| <b>Other information</b> |     |                                                                                                                                                                                                              |                      |
| Funding                  | 22  | Give the source of funding and the role of the funders for the present study and, if applicable, for the original study on which the present article is based                                                | 14                   |

\*Give information separately for cases and controls in case-control studies and, if applicable, for exposed and unexposed groups in cohort and cross-sectional studies.

**Note:** An Explanation and Elaboration article discusses each checklist item and gives methodological background and published examples of transparent reporting. The STROBE checklist is best used in conjunction with this article (freely available on the Web sites of PLoS Medicine at <http://www.plosmedicine.org/>, Annals of Internal Medicine at <http://www.annals.org/>, and Epidemiology at <http://www.epidem.com/>). Information on the STROBE Initiative is available at [www.strobe-statement.org](http://www.strobe-statement.org).

# BMJ Open

## Lumbopelvic pain, anxiety, physical activity and mode of conception: A prospective cohort study of pregnant women

|                                 |                                                                                                                                                                                                                                                                                                                                                                                                                                                                                                      |
|---------------------------------|------------------------------------------------------------------------------------------------------------------------------------------------------------------------------------------------------------------------------------------------------------------------------------------------------------------------------------------------------------------------------------------------------------------------------------------------------------------------------------------------------|
| Journal:                        | <i>BMJ Open</i>                                                                                                                                                                                                                                                                                                                                                                                                                                                                                      |
| Manuscript ID                   | bmjopen-2018-022508.R1                                                                                                                                                                                                                                                                                                                                                                                                                                                                               |
| Article Type:                   | Research                                                                                                                                                                                                                                                                                                                                                                                                                                                                                             |
| Date Submitted by the Author:   | 12-Jul-2018                                                                                                                                                                                                                                                                                                                                                                                                                                                                                          |
| Complete List of Authors:       | Lardon, Emeline; Universite du Quebec a Trois-Rivieres; Institut Franco-Européen de Chiropraxie<br>St-Laurent, Audrey; Universite du Quebec a Trois-Rivieres<br>Babineau, Véronique; Department of Obstetrics and Gynaecology, Centre intégré universitaire de santé et de services sociaux de la Mauricie-et-du-Centre-du-Québec, affiliated to the University of Montreal<br>Descarreaux, M; Universite du Quebec, Human kinetics<br>Ruchat, Stephanie-May; Universite du Quebec a Trois-Rivieres, |
| <b>Primary Subject Heading</b>: | Obstetrics and gynaecology                                                                                                                                                                                                                                                                                                                                                                                                                                                                           |
| Secondary Subject Heading:      | Sports and exercise medicine                                                                                                                                                                                                                                                                                                                                                                                                                                                                         |
| Keywords:                       | pregnancy, fertility treatments, anxiety, physical activity, lumbopelvic pain                                                                                                                                                                                                                                                                                                                                                                                                                        |
|                                 |                                                                                                                                                                                                                                                                                                                                                                                                                                                                                                      |

SCHOLARONE™  
Manuscripts

Only

1  
2  
3 1 **Manuscript title:** Lumbopelvic pain, anxiety, physical activity and mode of conception: A  
4 2 prospective cohort study of pregnant women  
5  
6 3

7 4 Emeline Lardon<sup>1,2, \*</sup>, Audrey St-Laurent<sup>1</sup>, Véronique Babineau<sup>3</sup>, Martin Descarreaux<sup>1</sup>,  
8 5 Stephanie-May Ruchat<sup>1, \*</sup>  
9  
10 6

11 7 **Authors Institutional Information**

12 8 <sup>1</sup> Département de Human Kinetics, Université du Québec à Trois-Rivières, Trois-Rivières,  
13 9 Canada

14 10 <sup>2</sup> Institut Franco-Européen de Chiropraxie, Paris, France

15 11 <sup>3</sup> Département de Obstetrics and Gynaecology, Centre intégré universitaire de santé et de  
16 12 services sociaux de la Mauricie-et-du-Centre-du-Québec, affiliated to the University of  
17 13 Montreal, Trois-Rivières, Canada

18 14 \* these authors contributed equally to the work  
19  
20  
21  
22  
23  
24  
25  
26

27 16 **Corresponding author:**

28 17 Stephanie-May Ruchat, PhD,  
29 18 Professor, Department of Human Kinetics  
30 19 Université du Québec à Trois-Rivières  
31 20 3351, Boul Des Forges, Trois-Rivières, QC G9A 5H7

32 21 E-mail : [stephanie-may.ruchat@uqtr.ca](mailto:stephanie-may.ruchat@uqtr.ca)  
33  
34  
35  
36  
37  
38  
39  
40  
41  
42  
43  
44  
45  
46  
47  
48  
49  
50  
51  
52  
53  
54  
55  
56  
57  
58  
59  
60

22 24 **Key words:** pregnancy; lumbopelvic pain; anxiety; physical activity; fertility treatments.

23 25  
24 26 **Word count:** 3636



## 1 ABSTRACT

2 **Objectives:** Pregnancy-related lumbopelvic pain (LPP) is a frequent condition known to  
3 significantly affect women's daily life. The etiology of pregnancy-related LPP pain is still not  
4 clearly established but the mode of conception has been suggested to contribute LPP. Anxiety  
5 related to fertility treatments may be one of the contributing factors. The primary objectives  
6 were to determine the evolution of LPP prevalence and severity, and anxiety, throughout  
7 pregnancy in women who conceived spontaneously (SP) or after fertility treatments (FT). A  
8 further aim was to examine the relationship between pregnancy-related LPP severity and  
9 anxiety. The secondary objective was to determine the evolution of physical activity and their  
10 correlation with the severity of pregnancy-related LPP.

11 **Design:** Prospective cohort study.

12 **Setting:** Pregnant women were recruited through physicians' referrals, posters and newspaper  
13 advertisements in the local and surrounding communities (hospital, maternity care clinic,  
14 prenatal centers, sports centers, local university).

15 **Participants:** Fifty-nine pregnant women (33 SP and 26 FT) were assessed during the 1<sup>st</sup>, 2<sup>nd</sup>  
16 and 3<sup>rd</sup> trimester of pregnancy.

17 **Primary and secondary outcome measures:** Pregnancy-related LPP prevalence and severity  
18 (primary), trait and state anxiety, and physical activity levels (secondary).

19 **Results:** There was no relationship between the mode of conception and the outcome  
20 measures. The prevalence and severity of LPP increased over the course of pregnancy (time  
21 effect,  $p < 0.0001$ ) whereas trait anxiety decreased from early to mid-pregnancy (time effect,  
22  $p = 0.03$ ). Activity limitations increased throughout pregnancy (time effect,  $p < 0.0001$ ) and  
23 physical activity levels decreased (time effect,  $p < 0.0001$ ). The severity of LPP was positively  
24 correlated with activity limitations ( $r = 0.51$  to  $0.55$ ) but negatively with physical activity  
25 levels ( $r = -0.39$  to  $-0.41$ ).

1  
2  
3 1 **Conclusions:** Maternal health-related factors, such as LPP, anxiety and physical activity, are  
4  
5 2 not different in women who conceived spontaneously or after fertility treatments. The more  
6  
7 3 LPP was severe, the more the women were physically limited and inactive.  
8  
9 4

10  
11 5 **Strengths and limitations of this study**  
12

- 13  
14 6 • This is a prospective cohort study of pregnant women who were assessed at each  
15  
16 7 trimester of pregnancy, allowing to determine the evolution of several maternal health-  
17  
18 8 related factors that are known to change over the course of pregnancy;  
19  
20 9 • Primary and secondary outcomes were collected using validated tools;  
21  
22 10 • The low number of women who achieved a pregnancy following *in vitro* fertilization  
23  
24 11 prevented us to fully test our hypotheses; thus larger studies are needed to better  
25  
26 12 understand whether IVF contribute to pregnancy-related LPP.  
27  
28 13 • More than half of the participants had a university degree, which is not representative of  
29  
30 14 our local population. The results may therefore not be broadly generalizable.  
31  
32  
33  
34  
35  
36  
37  
38  
39  
40  
41  
42  
43  
44  
45  
46  
47  
48  
49  
50  
51  
52  
53  
54  
55  
56  
57  
58  
59  
60

## 1 INTRODUCTION

2 More than 50% of women experience pain in the lumbopelvic area during pregnancy <sup>1</sup>. Low  
3 back pain (LBP) is defined as pain localized below the ribs, but above the gluteal folds, with  
4 or without radiation down the legs <sup>2</sup>, whereas pelvic girdle pain (PGP) is defined as pain  
5 “experienced between the posterior iliac crest and the gluteal fold, particularly in the vicinity  
6 of the sacroiliac joints. The pain may radiate in the posterior thigh and can also occur in  
7 conjunction with/or separately in the symphysis” <sup>1</sup>. The term lumbopelvic pain (LPP) is used  
8 when no distinction is made between PGP and LBP <sup>3</sup>. Thus the wide range in the reported  
9 prevalence of LPP in the literature (45–73%) <sup>4 5</sup> has been attributed to the different criteria  
10 used to classify types and severity of pain, and the different periods during pregnancy LPP  
11 was assessed. The onset of LPP varies considerably, between the end of the first trimester to  
12 the first month post-delivery, with a peak of symptoms generally occurring between the 24th  
13 and 36th weeks of pregnancy <sup>6</sup>. Pregnancy-related LPP is a debilitating condition that is  
14 known to affect women’s quality of life <sup>7</sup>, with repercussions such as disruption of sleep,  
15 increased psychological stress, social and sexual life and work capacity <sup>4 7-10</sup>. Pregnant women  
16 experiencing LPP are also known to be less physically active during pregnancy <sup>11</sup>. Prenatal  
17 physical activity is an important component of a healthy pregnancy <sup>12</sup> and all women without  
18 contraindication to exercise are encouraged to be regularly active throughout pregnancy to  
19 benefit from it <sup>13 14</sup>. On the other hand, pregnancy-related LPP can contribute to maternal  
20 physical inactivity and its associated maternal, fetal and neonatal complications <sup>12</sup>.

21 Several factors are believed to be involved in pregnancy-related LPP development, such as  
22 degenerative metabolic, genetic, hormonal, and biomechanical factors/non-optimal joint  
23 stability <sup>1 6</sup>. Another factor of interest is the mode of conception, in other words, naturally or  
24 after fertility treatments. A study reported that pregnant women who underwent *in vitro*  
25 fertilization (IVF) treatments had a two times higher prevalence rate of sacral pain in early

1 and late pregnancy, as well as a higher frequency of positive results on pelvic pain  
2 provocation tests in late pregnancy<sup>15</sup>. The authors concluded that relaxin causes pelvic pain  
3 because relaxin is higher in IVF pregnancies<sup>16</sup>. Another reason that might explain higher  
4 pregnancy-related LPP prevalence in women who conceived after IVF is higher anxiety  
5 levels. As reported by a systematic review, women who conceived following fertility  
6 treatments had greater pregnancy-specific anxiety than those who conceived naturally<sup>17</sup>.  
7 Based on a multi-center study including 1,158 women, higher levels of anxiety was reported  
8 to be among the most notable factors associated with a higher likelihood of reporting LBP<sup>18</sup>.  
9 However, to the best of our knowledge, no study has examined pregnancy-related LPP among  
10 women who achieve pregnancy naturally or after fertility treatment, and whether anxiety is a  
11 contributing factor to the development of LPP.

12 The primary objectives of this prospective cohort study were to determine the evolution of  
13 LPP prevalence and severity, as well as anxiety, over the course of pregnancy in women who  
14 conceived naturally or after fertility treatments, and to examine the possible relationship  
15 between pregnancy-related LPP severity and anxiety levels. As pregnancy-related LPP has a  
16 significant impact on the women's daily life, the secondary objective of our study was to  
17 determine the evolution of physical activity behaviors throughout pregnancy and whether the  
18 severity of LPP was correlated to these factors. Our primary hypotheses are that LPP  
19 prevalence and severity, as well as anxiety levels will increase over the course of pregnancy  
20 but more strongly in women who conceived after fertility treatments, and that pregnancy-  
21 related LPP severity will be positively correlated with anxiety levels. As a result, our  
22 secondary hypotheses are that activity limitations will increase whereas physical activity  
23 behaviors will decrease over the course of pregnancy but more significantly in women who  
24 conceived after fertility treatments, and that the severity of pregnancy-related LPP will be  
25 positively correlated with activity limitations but negatively with physical activity behaviors.

## 1 MATERIALS AND METHODS

### 2 Study design and participants' selection

3 This is a prospective cohort study of pregnant women who were recruited between October  
4 2015 and September 2016. Women who achieved a spontaneous pregnancy (SP group) and  
5 women who achieved pregnancy following fertility treatments (FT group) were recruited  
6 through physicians' and a clinic coordinator's referrals, posters and newspaper advertisements  
7 in the local and surrounding communities (hospital, maternity care clinic, prenatal centers,  
8 sports centers, local university). Women under 14 weeks of gestation, with a singleton  
9 pregnancy and able to understand, speak and write French were considered eligible to  
10 participate in the study. The study was approved by the local Research Ethics Committees  
11 (CER-2015-003 and CER-15-214-07.10) and all participants provided their written informed  
12 consent.

### 14 Outcome measures and measurement tools

15 Women were followed from the 1<sup>st</sup> trimester of pregnancy until delivery through three  
16 evaluations (1<sup>st</sup> trimester [TR1]: 10–16 weeks, 2<sup>nd</sup> trimester [TR2]: 24–28 weeks and 3<sup>rd</sup>  
17 trimester [TR3]: 32–36 weeks of gestation). In each trimester, a member of the research team  
18 asked the women if they have had pregnancy-related LPP over the last 7 days or if they were  
19 having LPP presently using the illustration provided in the French version of the Pelvic Girdle  
20 Questionnaire (PGQ) <sup>19</sup>. If a woman had or was having pregnancy-related LPP, she was asked  
21 to rate pain intensity using a visual analog pain scale (VAS). This scale is a self-reported  
22 measurement tool used by health professionals allowing the patient to rate pain from 0 (no  
23 pain) to 10 (extreme pain) <sup>20</sup>.

24 The levels of anxiety was assessed during TR1, TR2 and TR3 using the French-Canadian  
25 version <sup>21</sup> of the State-Trait Anxiety Inventory (STAI) <sup>22</sup>. The STAI is a self-reported

1  
2  
3 1 questionnaire assessing the presence and severity of current symptoms of anxiety (state  
4  
5 2 anxiety scale) and a generalized propensity to be anxious (trait anxiety scale). Each scale is  
6  
7 3 based on 20 items on a four-point response scale. The range of score for each scale is 20-80,  
8  
9 4 the higher score indicating greater anxiety levels. The STAI has been widely used in research  
10  
11 5 with pregnant women and it does reflect the anxiety-related experiences of pregnant women.  
12  
13 6 Its use with pregnant women is therefore appropriate<sup>23</sup>.

15 7 Activity limitations and symptoms associated with pregnancy-related LPP were assessed in  
16  
17 8 TR2 and TR3 using the completed the French-Canadian version of the PGQ was used<sup>19</sup>. The  
18  
19 9 PGQ is a condition-specific measure developed for pregnant and postpartum women. It  
20  
21 10 consists of 20 activity items and five symptom items on a four-point response scale and  
22  
23 11 assesses activity limitations and symptoms associated with pain in the lumbopelvic region.  
24  
25 12 The range of score is 0-100%, with a higher score indicating greater activity limitations and  
26  
27 13 symptoms. The PGQ is reliable and valid for both pregnant and postpartum women with  
28  
29 14 pregnancy-related LPP<sup>24</sup>.

32  
33 15 Finally, physical activity levels were objectively measured at each trimester of pregnancy  
34  
35 16 using the ActiGraph GT3X (ActiGraph, Pensacola, FL), a triaxial accelerometer measuring  
36  
37 17 data in a 60-s epoch. The women were instructed to wear the monitor over the hip on an  
38  
39 18 elastic belt for seven consecutive days from wake-up time to bedtime. They were allowed to  
40  
41 19 remove the accelerometer when sleeping, showering or engaging in water activities.  
42  
43 20 Furthermore, the women received a daily diary to document wear and non-wear time periods  
44  
45 21 and water activities. According to the method used in the Canadian Health Measures Survey,  
46  
47 22 valid data were defined as  $\geq$  four days of monitoring for  $\geq$  10 hours of wear time per day<sup>25</sup>.

48  
49  
50 23 Pregnant women were encouraged to maintain their usual activities. Data were processed  
51  
52 24 using the Actilife software version 6.13.2 (ActiGraph, LLC, FL, USA). The accelerometer  
53  
54 25 data obtained were averaged across valid wear days. To derive the activity frequency,  
55  
56  
57  
58  
59  
60

1 intensity and duration of the measured activity in counts per minute per day, the Freedson  
2 equation was used: sedentary (<100 counts), light (100–1951 counts), moderate (1952–5724),  
3 vigorous (5725–9498), and very vigorous (>9498)<sup>26</sup>, as previously used in pregnant women  
4<sup>27</sup>. Non-wear time was defined as a period of zero counts for  $\geq 60$  consecutive minutes,  
5 admitting a maximum of two consecutive minutes between 1 and 100 counts/min. When a  
6 third observation was between 1 and 100 counts or one observation was more than 100  
7 counts, the non-wear period was ended. Bouts of moderate-to-vigorous physical activity  
8 (MVPA) was defined as a minimum of 10 consecutive minutes above 1952 counts and ended  
9 with more than two consecutive records below this threshold.

## 10 **Patient and Public Involvement**

11 Patients and public were not involved in the design and conduct of this study. The results will  
12 not be disseminated to study participants.

## 13 **Statistical analysis**

14 Means and standard deviations, as well as percentages, were computerized for variables of  
15 interest. Student t-test was used to compare socio-demographic and anthropometric  
16 characteristics between SP and FT women. For categorical variables, the  $\chi$  square test was  
17 used. The MIXED procedure of SAS was used to test the effect of time (trimesters), group  
18 (SP and FT women) and potential interaction effects on the outcome measures (i.e. the  
19 severity of pregnancy-related LPP and anxiety levels [objective 1], and physical activity  
20 behaviors [objective 2]). The assumption of sphericity was tested using Mauchly's Test of  
21 Sphericity. Variables that did not meet the sphericity assumption were analyzed following a  
22 Geisser Greenhouse correction. When a significant effect of time, group or interaction effect  
23 was found, post-hoc analyses were conducted using the Tukey test. To test whether the  
24 severity of pregnancy-related LPP was correlated to the levels of anxiety (objective 1), and  
25  
26

1 physical activity behaviors (objective 2) at each trimester of pregnancy, Pearson's correlation  
2 analyses were used. Statistical analyses were performed by using the SAS software (Institute,  
3 Cary, NC, version 9.4) and the level of significance was set to  $p\text{-value} \leq 0.05$ .

## 4 5 **RESULTS**

6 Between October 2015 and September 2016, the study was presented by physicians or to 117  
7 eligible pregnant women, among which 62 women accepted to participate. Reasons for not  
8 agreeing to participate to the study were lack of interest or lack of time. Three women (1 in  
9 SP group and 2 in FT group) were excluded due to loss to follow-up (n=1), miscarriage (n=1)  
10 or missing data (n=1), leaving 59 women (33 SP and 26 FT) for the statistical analyses.

11 The characteristics of pregnant women are presented in **Table 1**. No significant difference in  
12 socio-demographic and pre-pregnancy anthropometric characteristics was found between the  
13 groups ( $p>0.05$ ). Women were on average in their early thirties and approximately half of  
14 them were nulliparous. More than half were of normal weight pre-pregnancy (BMI 18.5-24.9  
15  $\text{kg/m}^2$ ) and had a university degree. Women's LPP history, related or not to a previous  
16 pregnancy, was also similar between the groups, with approximately 50% of the women  
17 reporting a history of LPP (**Table 1**). Finally, the prevalence and severity of pregnancy-  
18 related LPP, anxiety and physical activity levels were not different between SP and FT  
19 pregnant women at study entry (**Table 1**). Data showed that on average, women considered  
20 LPP as moderate (4/10) and were slightly anxious (35/80). Moreover, based on daily steps  
21 and physical activity recommendations<sup>28 29</sup>, our population was considered inactive.

22 In our study, a total of 8 (13.5%), 8 (13.5%) and 9 (15%) women removed the accelerometer  
23 to do water activities (aqua gym, swimming or bathing) during TR1, TR2 and TR3,  
24 respectively. The accelerometer was removed between 1 and 5 times during the evaluation  
25 period, and for 10 to 225 minutes. Furthermore, physical activity data was missing for 10



1 (17%), 7 (12%) and 8 (14%) women at TR1, TR2 and TR3, respectively, because those  
2 women did not wear the accelerometer for at least 10 hours per day for at least four days.  
3 The prevalence of pregnancy-related LPP was similar in both groups during each trimester of  
4 pregnancy (TR1:  $\chi^2 = 2.19$ ,  $p=0.33$ ; TR2:  $\chi^2 = 2.13$ ,  $p=0.33$ ; TR3:  $\chi^2 = 0.01$ ,  $p=0.92$ ); the  
5 pooled prevalence increased from 42% during TR1 to 65% during TR2 to 68% during TR3  
6 ( $\chi^2 = 8.45$ ;  $p=0.01$ ) (**Fig 1**). Among women presenting with pregnancy-related LPP at one  
7 time point during pregnancy ( $n=44$ , 26 SP and 18 FT), pain severity significantly increased  
8 over the course of pregnancy in both groups (time effect:  $F=14.81$ ,  $p<0.0001$ . **Fig 2**), with  
9 pain severity being significantly higher during TR2 and TR3 compared to TR1. Trait anxiety  
10 decreased over the course of pregnancy in both groups (time effect:  $F=3.93$ ,  $p<0.03$ . **Fig 3**),  
11 with lower levels during TR2 compared to TR1, whereas state anxiety did not significantly  
12 change (**Fig 4**). Finally, activity limitations associated with pregnancy-related LPP increased  
13 (time effect:  $F=18.82$ ,  $p<0.0001$ . **Fig 5**) whereas daily steps decreased over the course of  
14 pregnancy in both groups (time effect:  $F=16.03$ ,  $p<0.0001$ . **Fig 6**). The only time by group  
15 interaction effect was found for daily MVPA (time effect:  $F=13.11$ ,  $p<0.0001$ ; time\*group  
16 interaction effect:  $F=3.38$ ,  $p=0.04$ . **Fig 7**), with daily MVPA being lower in TR3 compared to  
17 TR1 and TR2 only in SP women.

18 Since changes in the severity of pregnancy-related LPP, levels of anxiety, and physical  
19 activity behaviors were similar between the groups, result from SP and FT women were  
20 pooled in the correlation analyses. Among women who presented with pregnancy-related  
21 LPP, no correlation was found during TR1 between the severity of pregnancy-related LPP  
22 and anxiety or physical activity levels. During TR2, the severity of pregnancy-related LPP  
23 was positively correlated with activity limitations ( $r=0.51$ ,  $p=0.001$ , **Fig 8**) but negatively  
24 with daily steps ( $r=-0.39$ ,  $p=0.03$ , **Fig 9**). No correlation was found with daily MVPA (**Fig**  
25 **10**). During TR3, we found a positive correlation between the severity of pregnancy-related

1 LPP and activity limitations ( $r=0.55$ ,  $p=0.0002$ , **Fig 11**) and a negative correlation with daily  
2 MVPA ( $r=-0.41$ ,  $p=0.02$ , **Fig 12**). No correlation was found with daily steps (**Fig 13**).

#### 4 **DISCUSSION**

5 To the best of our knowledge, this is the first cohort study assessing the course of pregnancy-  
6 related LPP prevalence and severity in pregnant women who conceived naturally and after  
7 fertility treatments, and possible association with anxiety levels and physical activity  
8 behaviors. Overall, our primary results showed no differences in LPP prevalence and severity,  
9 or anxiety levels between women who achieved a pregnancy naturally or after fertility  
10 treatments. As expected, the prevalence and severity of LPP increased over the course of  
11 pregnancy and were of similar magnitude than that reported in previous studies<sup>10,18</sup>. Anxiety  
12 levels decreased from early to mid-pregnancy and were not correlated to the severity of LPP.

13 Only one study examined the evolution of the prevalence and severity of pregnancy-related  
14 PGP (PPGP) according to the mode of conception<sup>15</sup>. This study was conducted in 31 women  
15 who conceived after IVF and 200 women who conceived spontaneously and assessed PGP at  
16 12, 24 and 34 weeks of pregnancy. The authors found an increase in PPGP prevalence and  
17 severity over the course of pregnancy in all women, as we and other authors did<sup>30</sup>. However,  
18 they reported a two times higher rate of PPGP in early and late pregnancy in women who  
19 achieved a pregnancy after IVF compared to those who achieved a pregnancy naturally but  
20 similar severity of PPGP<sup>15</sup>. Importantly, many IVF women carried multiple pregnancies in  
21 that study. Given that relaxin levels are higher after IVF<sup>16</sup> and that the number of fetuses is  
22 higher after IVF, and given that the mechanical load is higher in twin pregnancies, it is  
23 difficult to establish what causes higher rates of PPGP after IVF in this previous study.

24 Our hypothesis was that higher anxiety levels reported in women who conceived after fertility  
25 treatments<sup>17</sup> would contribute to higher pregnancy-related LPP prevalence and severity in

1 this population of pregnant women. However, we did not find any difference in anxiety levels  
2 between women who conceived after fertility treatments and those who conceived naturally.  
3 Several reasons may explain our result. First, the majority of women included in our sample  
4 conceived after ovarian stimulation (OS, n=7) or intrauterine insemination (IUI, n=12),  
5 whereas the majority of studies included in Gourounti's review reporting higher anxiety in  
6 women who conceived following fertility treatments were conducted in the context of IVF<sup>17</sup>.  
7 Because the medical surveillance is more frequent and the procedure more invasive in the  
8 context of IVF, it is likely that IVF generates more anxiety than OS and IUI. This might  
9 partially explain why we found no differences in anxiety levels in our sample.

10 When examining anxiety levels over the course of pregnancy, we found a U-shaped curve,  
11 with a significant decrease in anxiety from TR1 to TR2 and a non-significant trend toward an  
12 increase from TR2 to TR3. These findings are similar to those of previous studies<sup>31 32</sup>. In  
13 contrast, whereas some studies reported higher anxiety in pregnant women with LBP or PGP  
14<sup>18 33</sup>, we found no correlation between anxiety levels and LPP severity. Our findings suggest  
15 that in our sample, anxiety and LPP were two independent phenomena.

16 Likewise, our secondary results showed no relationship between the mode of conception and  
17 physical limitations and physical activity behaviors, except for MVPA during TR3. The  
18 decrease in MVPA observed only in women who conceived naturally needs further  
19 investigation. Similarly to previous studies<sup>34-37</sup>, we found that with advancing pregnancy,  
20 physical limitations increased<sup>36-38</sup> and physical activity behaviors decreased<sup>34 35 39</sup>. Our data  
21 further showed that the greater pregnancy-related LPP severity the greater physical limitation  
22 and lower physical activity levels in mid- and late pregnancy. These results are also in  
23 accordance with previous studies reporting decreased physical activity levels as physical  
24 limitations and low back pain increase with advancing pregnancy<sup>36 40</sup>.

## 25 26 **Limitations**

1  
2  
3 1 The strength of our study is its longitudinal design that allowed us to examine the evolution of  
4  
5 2 several maternal health-related factors that are known to change over the course of pregnancy,  
6  
7 3 in the context of spontaneous pregnancies and pregnancies achieved following FT. Moreover,  
8  
9 4 our study adds knowledge about the relationship between pregnancy-related LPP severity and  
10  
11 5 physical activity behaviors. However, the current study has limitations that should be  
12  
13 6 acknowledged. First, our sample was heterogeneous with regards to fertility treatments used  
14  
15 7 to achieve a pregnancy, with the majority of women having conceived after OS or IUI. This  
16  
17 8 may explain the lower prevalence of PPGP and anxiety levels in women who conceived after  
18  
19 9 fertility treatments. The low number of women who achieved a pregnancy following IVF  
20  
21 10 prevented us to fully test our hypotheses and further larger studies are needed to better  
22  
23 11 understand whether IVF contribute to pregnancy-related. Second, more than half of the  
24  
25 12 women we recruited had a university degree, which is more than in our local population  
26  
27 13 (22.5%)<sup>41</sup>. This suggests a possible recruitment bias and limits the generalizability of our  
28  
29 14 results. Third, although accelerometers provide a valid and objective measure of physical  
30  
31 15 activity levels, non-waterproof accelerometers underestimate several types of physical  
32  
33 16 activity, such as water activities. In our data set, several women removed the accelerometer to  
34  
35 17 do water activities (aqua gym, swimming or bathing) during TR1, TR2 and TR3, suggesting  
36  
37 18 that we possibly underestimated the level of physical activity of these women. We also had  
38  
39 19 missing physical activity data because some women did not wear the accelerometer for at  
40  
41 20 least 10 hours per day for at least four days. Finally, physical activity levels were assessed  
42  
43 21 only for a seven-day period during each trimester of pregnancy. Given that each trimester  
44  
45 22 lasts for more than a week, the data obtained and the results reported in relation to physical  
46  
47 23 activity levels do not truly reflect the evolution of physical activity levels over each trimester  
48  
49 24 and over the entire course of pregnancy. Nevertheless, the majority of the women stated in the  
50  
51  
52  
53  
54  
55  
56  
57  
58  
59  
60

1  
2  
3 1 daily diary that their physical activity behavior over the seven-day period of evaluation  
4  
5 2 reflected their habitual behaviors.  
6

7 3

#### 9 4 **CONCLUSION**

11 5 In conclusion, our findings suggest that maternal health-related factors, such as LPP, anxiety  
12  
13 6 and physical activity behaviors, are not different in women who conceived after fertility  
14  
15 7 treatments and those who conceived spontaneously. The lack of correlation between the  
16  
17 8 severity of pregnancy-related LPP and anxiety levels suggests that they are two independent  
18  
19 9 phenomena. The increase in LPP severity and activity limitations, and decrease in physical  
20  
21 10 activity behaviors with advancing gestation, and the fact that the more severe LPP the greater  
22  
23 11 activity limitations and physical inactivity in mid- and late pregnancy underline the  
24  
25 12 importance of pregnancy-related LPP management to allow pregnant women performing their  
26  
27 13 daily activities.  
28  
29

30  
31 14

32  
33 15  
34  
35  
36  
37  
38  
39  
40  
41  
42  
43  
44  
45  
46  
47  
48  
49  
50  
51  
52  
53  
54  
55  
56  
57  
58  
59  
60

1  
2  
3 1 **Acknowledgments:** The authors would like to acknowledge and thank Sophie Drouin, the  
4  
5 2 coordinator of the fertility clinic, as well as the medical team who assisted with the  
6  
7 3 recruitment, and all the women who participated to the project.  
8  
9 4

10  
11 5 **Funding:** This study was funded by a start-up grant from the Univeristé du Québec à Trois-  
12  
13 6 Rivières (Institutional funds for research).  
14  
15 7

16  
17  
18 8 **Declaration of conflicting interests:** The authors declare that there is no conflict of interest.  
19  
20 9

21  
22 10 **Author Contributions:** SMR, MD, VB contributed to the study concept and design; EL and  
23  
24 11 AStL acquired the data; SMR, MD, EL performed the statistical analysis and interpreted the  
25  
26 12 data; EL and SMR drafted the manuscript; MD, AStL and VB critically reviewed the  
27  
28 13 manuscript for important intellectual content. All authors read and approved the final  
29  
30 14 manuscript.  
31  
32 15

33  
34  
35 16 **Competing interests:** None declared.  
36  
37 17

38  
39 18 **Ethics approval:** The study was approved by the local Research Ethics Committees (CER-  
40  
41 19 2015-003 and CER-15-214-07.10)  
42  
43 20

44  
45  
46 21 **Data sharing statement:** No additional data are available.  
47  
48 22  
49  
50  
51  
52  
53  
54  
55  
56  
57  
58  
59  
60

## 1 References

- 1 2 1. Vleeming A, Albert HB, Ostgaard HC, et al. European guidelines for the diagnosis and  
3 4 treatment of pelvic girdle pain. *Eur Spine J* 2008;17(6):794-819. doi: 10.1007/s00586-008-  
5 6 0602-4 [published Online First: 2008/02/09]
- 7 8 2. van Tulder M, Becker A, Bekkering T, et al. Chapter 3. European guidelines for the  
9 10 management of acute nonspecific low back pain in primary care. *Eur Spine J* 2006;15 Suppl  
11 12 2:S169-91. doi: 10.1007/s00586-006-1071-2
- 13 14 3. Wu WH, Meijer OG, Uegaki K, et al. Pregnancy-related pelvic girdle pain (PPP), I:  
15 16 Terminology, clinical presentation, and prevalence. *Eur Spine J* 2004;13(7):575-89. doi:  
17 18 10.1007/s00586-003-0615-y [published Online First: 2004/09/01]
- 19 20 4. Gutke A, Ostgaard HC, Oberg B. Pelvic girdle pain and lumbar pain in pregnancy: a cohort  
21 22 study of the consequences in terms of health and functioning. *Spine (Phila Pa 1976)*  
23 24 2006;31(5):E149-55. doi: 10.1097/01.brs.0000201259.63363.e1 [published Online First:  
25 26 2006/03/02]
- 27 28 5. Mogren IM, Pohjanen AI. Low back pain and pelvic pain during pregnancy: prevalence  
29 30 and risk factors. *Spine (Phila Pa 1976)* 2005;30(8):983-91. [published Online First:  
31 32 2005/04/19]
- 33 34 6. Kanakaris NK, Roberts CS, Giannoudis PV. Pregnancy-related pelvic girdle pain: an  
35 36 update. *BMC Med* 2011;9:15. doi: 10.1186/1741-7015-9-15 [published Online First:  
37 38 2011/02/18]
- 39 40 7. Olsson C, Nilsson-Wikmar L. Health-related quality of life and physical ability among  
41 42 pregnant women with and without back pain in late pregnancy. *Acta Obstet Gynecol Scand*  
43 44 2004;83(4):351-57. [published Online First: 2004/03/10]
- 45 46 8. Elden H, Lundgren I, Robertson E. Life's pregnant pause of pain: pregnant women's  
47 48 experiences of pelvic girdle pain related to daily life: a Swedish interview study. *Sex Reprod*  
49 50 *Healthc* 2013;4(1):29-34. doi: 10.1016/j.srhc.2012.11.003
- 51 52 9. Mogren I. Perceived health, sick leave, psychosocial situation, and sexual life in women  
53 54 with low-back pain and pelvic pain during pregnancy. *Acta Obstet Gynecol Scand*  
55 56 2006;85(6):647-56. doi: 10.1080/00016340600607297 [published Online First: 2006/06/06]
- 57 58 10. Wang SM, Dezinno P, Maranets I, et al. Low back pain during pregnancy: prevalence,  
59 60 risk factors, and outcomes. *Obstet Gynecol* 2004;104(1):65-70. doi:  
10.1097/01.AOG.0000129403.54061.0e [published Online First: 2004/07/02]
11. Owe KM, Nystad W, Bo K. Correlates of regular exercise during pregnancy: the  
Norwegian Mother and Child Cohort Study. *Scand J Med Sci Sports* 2009;19(5):637-45. doi:  
10.1111/j.1600-0838.2008.00840.x [published Online First: 2008/07/17]



- 1  
2  
3 1 12. Mudd LM, Owe KM, Mottola MF, et al. Health benefits of physical activity during  
4 2 pregnancy: an international perspective. *Med Sci Sports Exerc* 2013;45(2):268-77. doi:  
5 3 10.1249/MSS.0b013e31826cebc [published Online First: 2012/08/17]  
6  
7 4 13. Davies GA, Wolfe LA, Mottola MF, et al. Exercise in pregnancy and the postpartum  
8 5 period. *Journal of obstetrics and gynaecology Canada : JOGC = Journal d'obstetrique et*  
9 6 *gynecologie du Canada : JOGC* 2003;25(6):516-29. [published Online First: 2003/06/14]  
11  
12 7 14. ACOG Committee Opinion No. 650: Physical Activity and Exercise During Pregnancy  
13 8 and the Postpartum Period. *Obstet Gynecol* 2015;126(6):e135-42. doi:  
14 9 10.1097/aog.0000000000001214 [published Online First: 2015/11/26]  
15  
16 10 15. Kristiansson P, Nilsson-Wikmar L, von Schoultz B, et al. Back pain in in-vitro fertilized  
17 11 and spontaneous pregnancies. *Hum Reprod* 1998;13(11):3233-8. [published Online First:  
18 12 1998/12/16]  
19  
20 13 16. Kristiansson P, Svardsudd K, von Schoultz B, et al. Supraphysiological serum relaxin  
21 14 concentration during pregnancy achieved by in-vitro fertilization is strongly correlated to the  
22 15 number of growing follicles in the treatment cycle. *Hum Reprod* 1996;11(9):2036-40.  
23  
24 16 17. Gourounti K. Psychological stress and adjustment in pregnancy following assisted  
25 17 reproductive technology and spontaneous conception: A systematic review. *Women Health*  
26 18 2015:1-21. doi: 10.1080/03630242.2015.1074642 [published Online First: 2015/07/28]  
27  
28 19 18. Kovacs FM, Garcia E, Royuela A, et al. Prevalence and factors associated with low back  
29 20 pain and pelvic girdle pain during pregnancy: a multicenter study conducted in the Spanish  
30 21 National Health Service. *Spine (Phila Pa 1976)* 2012;37(17):1516-33. doi:  
31 22 10.1097/BRS.0b013e31824dcb74 [published Online First: 2012/02/16]  
32  
33 23 19. Girard MP, Marchand AA, Stuge B, et al. Cross-cultural Adaptation of the Pelvic Girdle  
34 24 Questionnaire for the French-Canadian Population. *J Manipulative Physiol Ther*  
35 25 2016;39(7):494-9. doi: 10.1016/j.jmpt.2016.06.002 [published Online First: 2016/08/19]  
36  
37 26 20. Ostelo RW, Deyo RA, Stratford P, et al. Interpreting change scores for pain and  
38 27 functional status in low back pain: towards international consensus regarding minimal  
39 28 important change. *Spine (Phila Pa 1976)* 2008;33(1):90-4. doi:  
40 29 10.1097/BRS.0b013e31815e3a10 [published Online First: 2008/01/01]  
41  
42 30 21. Gauthier J, Bouchard S. Adaptation canadienne-française de la forme révisée du State-  
43 31 Trait Anxiety Inventory de Spielberg. *Canadian Journal of Behavioral Sciences* 1990;25  
44 32 (4):559-89. [published Online First: 1993/10]  
45  
46 33 22. Spielberger CD. Manual for the State-Trait Anxiety Inventory (Form Y): Palo Alto:  
47 34 Consulting Psychologist Press 1983.



- 1  
2  
3 1 23. Gunning MD, Denison FC, Stockley CJ, et al. Assessing maternal anxiety in pregnancy  
4 2 with the State - Trait Anxiety Inventory (STAI): issues of validity, location and participation.  
5 3 *Journal of Reproductive and Infant Psychology* 2010;28(3):266-73.  
6  
7  
8 4 24. Stuge B, Garratt A, Krogstad Jenssen H, et al. The pelvic girdle questionnaire: a  
9 5 condition-specific instrument for assessing activity limitations and symptoms in people with  
10 6 pelvic girdle pain. *Phys Ther* 2011;91(7):1096-108. doi: 10.2522/ptj.20100357 [published  
11 7 Online First: 2011/05/21]  
12  
13 8 25. Colley RC, Garriguet D, Janssen I, et al. Activité physique des adultes au Canada:  
14 9 résultats d'accélérométrie de l'Enquête Canadienne sur les mesures de la santé de 2007-2009.  
15 10 *Statistique Canada Rapports sur la santé* 2011  
16  
17  
18 11 26. Freedson PS, Melanson E, Sirard J. Calibration of the Computer Science and  
19 12 Applications, Inc. accelerometer. *Med Sci Sports Exerc* 1998;30(5):777-81. [published Online  
20 13 First: 1998/05/20]  
21  
22  
23 14 27. Harrison CL, Thompson RG, Teede HJ, et al. Measuring physical activity during  
24 15 pregnancy. *Int J Behav Nutr Phys Act* 2011;8:19. doi: 10.1186/1479-5868-8-19  
25  
26 16 28. Tudor-Locke C, Bassett DR, Jr. How many steps/day are enough? Preliminary pedometer  
27 17 indices for public health. *Sports Med* 2004;34(1):1-8.  
28  
29  
30 18 29. Evenson KR, Mottola MF, Owe KM, et al. Summary of international guidelines for  
31 19 physical activity after pregnancy. *Obstet Gynecol Surv* 2014;69(7):407-14. doi:  
32 20 10.1097/OGX.0000000000000077  
33  
34 21 30. Kristiansson P, Svardsudd K, von Schoultz B. Back pain during pregnancy: a prospective  
35 22 study. *Spine (Phila Pa 1976)* 1996;21(6):702-9. [published Online First: 1996/03/15]  
36  
37  
38 23 31. Lee AM, Lam SK, Sze Mun Lau SM, et al. Prevalence, course, and risk factors for  
39 24 antenatal anxiety and depression. *Obstet Gynecol* 2007;110(5):1102-12. doi:  
40 25 10.1097/01.AOG.0000287065.59491.70  
41  
42  
43 26 32. Teixeira C, Figueiredo B, Conde A, et al. Anxiety and depression during pregnancy in  
44 27 women and men. *J Affect Disord* 2009;119(1-3):142-8. doi: 10.1016/j.jad.2009.03.005  
45 28 [published Online First: 2009/04/07]  
46  
47  
48 29 33. Elden H, Gutke A, Kjellby-Wendt G, et al. Predictors and consequences of long-term  
49 30 pregnancy-related pelvic girdle pain: a longitudinal follow-up study. *BMC Musculoskelet*  
50 31 *Disord* 2016;17:276. doi: 10.1186/s12891-016-1154-0  
51  
52 32 34. Evenson KR, Wen F. Prevalence and correlates of objectively measured physical activity  
53 33 and sedentary behavior among US pregnant women. *Prev Med* 2011;53(1-2):39-43. doi:  
54 34 10.1016/j.ypmed.2011.04.014  
55  
56  
57  
58  
59

- 1  
2  
3 1 35. Rousham EK, Clarke PE, Gross H. Significant changes in physical activity among  
4 2 pregnant women in the UK as assessed by accelerometry and self-reported activity. *Eur J Clin*  
5 3 *Nutr* 2006;60(3):393-400.  
6  
7  
8 4 36. Cramp AG, Bray SR. A prospective examination of exercise and barrier self-efficacy to  
9 5 engage in leisure-time physical activity during pregnancy. *Ann Behav Med* 2009;37(3):325-  
10 6 34. doi: 10.1007/s12160-009-9102-y  
11  
12 7 37. Robinson HS, Veierod MB, Mengshoel AM, et al. Pelvic girdle pain--associations  
13 8 between risk factors in early pregnancy and disability or pain intensity in late pregnancy: a  
14 9 prospective cohort study. *BMC Musculoskelet Disord* 2010;11:91. doi: 10.1186/1471-2474-  
15 10 11-91  
16  
17  
18 11 38. Chang HY, Lai YH, Jensen MP, et al. Factors associated with low back pain changes  
19 12 during the third trimester of pregnancy. *J Adv Nurs* 2014;70(5):1054-64. doi:  
20 13 10.1111/jan.12258  
21  
22  
23 14 39. Downs DS, LeMasurier GC, DiNallo JM. Baby steps: pedometer-determined and self-  
24 15 reported leisure-time exercise behaviors of pregnant women. *J Phys Act Health* 2009;6(1):63-  
25 16 72.  
26  
27 17 40. Poston L, Briley AL, Barr S, et al. Developing a complex intervention for diet and activity  
28 18 behaviour change in obese pregnant women (the UPBEAT trial); assessment of behavioural  
29 19 change and process evaluation in a pilot randomised controlled trial. *BMC Pregnancy*  
30 20 *Childbirth* 2013;13:148. doi: 10.1186/1471-2393-13-148  
31  
32  
33 21 41. Statistics Canada. Labour Force Survey, special compilation, adapted by the Institut de la  
34 22 statistique du Québec., July 14, 2017.  
35 23  
36  
37 24  
38  
39  
40  
41  
42  
43  
44  
45  
46  
47  
48  
49  
50  
51  
52  
53  
54  
55  
56  
57  
58  
59  
60

1 **Table 1:** Baseline characteristics of the 59 pregnant women included in study.

| Variables                                                    | FT<br>(n=26)<br>Means $\pm$ SD | SP<br>(n=33)<br>Means $\pm$ SD | P values |
|--------------------------------------------------------------|--------------------------------|--------------------------------|----------|
| Fertility treatments                                         | OS=7<br>IUI=12<br>IVF=7        | -                              |          |
| Age (years)                                                  | 32.2 $\pm$ 3.6                 | 30.9 $\pm$ 4.2                 | 0.23     |
| Parity                                                       | 0.4 $\pm$ 0.6                  | 0.6 $\pm$ 0.6                  | 0.36     |
| 0 (n)                                                        | 57.7% (15)                     | 45.5% (15)                     | 0.35     |
| $\geq$ 1 (n)                                                 | 42.3% (11)                     | 54.6% (18)                     |          |
| Pre-pregnancy BMI (kg/cm <sup>2</sup> )                      | 26.3 $\pm$ 7.3                 | 25.2 $\pm$ 6.6                 | 0.54     |
| Underweight <18.4                                            | 0% (0)                         | 3.1% (1)                       | 0.81     |
| Normal weight (18.5-24.9)                                    | 60.0 (15)                      | 62.5% (20)                     |          |
| Overweight (25.0-29.9)                                       | 20.0 (5)                       | 18.8% (6)                      |          |
| Obese $\geq$ 30.0                                            | 20.0%(5)                       | 15.6% (5)                      |          |
| Education levels                                             |                                |                                |          |
| Non-university degree                                        | 42.3% (11)                     | 33.3% (11)                     | 0.48     |
| University degree                                            | 57.7% (15)                     | 66.7% (22)                     |          |
| LPP history (yes) <sup>1</sup>                               | 46.2% (12)                     | 54.6% (18)                     | 0.52     |
| Prevalence of pregnancy-related LPP over the last week (yes) | 34.6% (9)                      | 48.5% (16)                     | 0.33     |
| Severity of pregnancy-related LPP over the last week         | 2.9 $\pm$ 1.9                  | 4.1 $\pm$ 2.3                  | 0.18     |
| State anxiety                                                | 37.4 $\pm$ 11.6                | 34.2 $\pm$ 9.1                 | 0.28     |
| Trait anxiety                                                | 39.8 $\pm$ 10.0                | 37.1 $\pm$ 9.4                 | 0.26     |
| Daily steps                                                  | 5328 $\pm$ 1551                | 5569 $\pm$ 1552                | 0.80     |
| Daily MVPA (min)                                             | 16.3 $\pm$ 10.0                | 17.4 $\pm$ 13.2                | 0.97     |

FT: fertility treatment; SP: spontaneous conception; OS: ovarian stimulation; IUI: intrauterine insemination; IVF: *in vitro* fertilization; BMI : body mass index; LPP : lumbopelvic pain; MVPA: moderate-to-vigorous physical activity

<sup>1</sup> LPP history includes history of pregnancy-related LPP and LPP not related to pregnancy

Missing data: pre-pregnancy BMI: 1 FT, 1 SP; state and trait anxiety : 1 SP; accelerometer data: 4 SP; 6 FT

2

3

1  
2  
3 **1 Figure legend**  
4

5 2

6  
7 **3 Figure 1:** Prevalence of pregnancy-related lumbopelvic pain (LPP) in women who conceived  
8 spontaneously (SP) or after fertility treatments (FT) over the course of pregnancy.  
9

10 **5 Figure 1 footnote:** TR1: 1<sup>st</sup> trimester of pregnancy; TR2: 2<sup>nd</sup> trimester of pregnancy; TR3: 3<sup>rd</sup>  
11 trimester of pregnancy.  
12  
13

14 7

15  
16  
17  
18 **8 Figure 2:** Evolution of pregnancy-related lumbopelvic pain (LPP) severity in women who  
19 conceived spontaneously (SP) or after fertility treatments (FT) over the course of pregnancy.  
20

21  
22 **10 Figure 2 footnote:** TR1: 1<sup>st</sup> trimester of pregnancy; TR2: 2<sup>nd</sup> trimester of pregnancy; TR3: 3<sup>rd</sup>  
23 trimester of pregnancy.  
24  
25

26 12

27  
28  
29 **13 Figure 3:** Evolution of trait anxiety in women who conceived spontaneously (SP) or after  
30 fertility treatments (FT) over the course of pregnancy.  
31

32  
33 **15 Figure 3 footnote:** TR1: 1<sup>st</sup> trimester of pregnancy; TR2: 2<sup>nd</sup> trimester of pregnancy; TR3: 3<sup>rd</sup>  
34 trimester of pregnancy.  
35  
36

37 17

38  
39  
40 **18 Figure 4:** Evolution of state anxiety in women who conceived spontaneously (SP) or after  
41 fertility treatments (FT) over the course of pregnancy.  
42

43  
44 **20 Figure 4 footnote:** TR1: 1<sup>st</sup> trimester of pregnancy; TR2: 2<sup>nd</sup> trimester of pregnancy; TR3: 3<sup>rd</sup>  
45 trimester of pregnancy.  
46  
47

48 22

49  
50 **23 Figure 5:** Evolution of activity limitations in women who conceived spontaneously (SP) or  
51 after fertility treatments (FT) over the course of pregnancy.  
52  
53

54 24

1  
2  
3 1 **Figure 5 footnote:** TR1: 1<sup>st</sup> trimester of pregnancy; TR2: 2<sup>nd</sup> trimester of pregnancy; TR3: 3<sup>rd</sup>  
4 trimester of pregnancy.  
5  
6

7 3

8  
9 4 **Figure 6:** Evolution of daily moderate-to-vigorous physical activity (MVPA) in women who  
10 conceived spontaneously (SP) or after fertility treatments (FT) over the course of pregnancy.  
11  
12

13 6 **Figure 6 footnote:** TR1: 1<sup>st</sup> trimester of pregnancy; TR2: 2<sup>nd</sup> trimester of pregnancy; TR3: 3<sup>rd</sup>  
14 trimester of pregnancy.  
15  
16

17 8

18  
19 9 **Figure 7:** Evolution of daily step counts in women who conceived spontaneously (SP) or  
20 after fertility treatments (FT) over the course of pregnancy.  
21  
22

23 11 **Figure 7 footnote:** TR1: 1<sup>st</sup> trimester of pregnancy; TR2: 2<sup>nd</sup> trimester of pregnancy; TR3: 3<sup>rd</sup>  
24 trimester of pregnancy.  
25  
26

27 13

28  
29 14 **Figure 8:** Correlation between the severity of pregnancy-related lumbopelvic pain (LPP) and  
30 activity limitations in the 2<sup>nd</sup> trimester of pregnancy (TR2).  
31  
32

33 16

34  
35 17 **Figure 9:** Correlation between the severity of pregnancy-related lumbopelvic pain (LPP) and  
36 daily moderate-to-vigorous physical activity (MVPA) in the 2<sup>nd</sup> trimester of pregnancy (TR2).  
37  
38

39 19

40  
41 20 **Figure 10:** Correlation between the severity of pregnancy-related lumbopelvic pain (LPP) and  
42 daily step counts in the 2<sup>nd</sup> trimester of pregnancy (TR2).  
43  
44

45 22

46  
47 23 **Figure 11:** Correlation between the severity of pregnancy-related lumbopelvic pain (LPP) and  
48 activity limitations in the 3<sup>rd</sup> trimester of pregnancy (TR3).  
49  
50

51 25

1  
2  
3 1 **Figure 12:** Correlation between the severity of pregnancy-related lumbopelvic pain (LPP) and  
4  
5 2 daily moderate-to-vigorous physical activity (MVPA) in the 3<sup>rd</sup> trimester of pregnancy (TR3).  
6

7 3  
8  
9 4 **Figure 13:** Correlation between the severity of pregnancy-related lumbopelvic pain (LPP) and  
10  
11 5 daily step counts in the 3<sup>rd</sup> trimester of pregnancy (TR3).  
12

13 6  
14  
15  
16  
17  
18  
19  
20  
21  
22  
23  
24  
25  
26  
27  
28  
29  
30  
31  
32  
33  
34  
35  
36  
37  
38  
39  
40  
41  
42  
43  
44  
45  
46  
47  
48  
49  
50  
51  
52  
53  
54  
55  
56  
57  
58  
59  
60

For peer review only

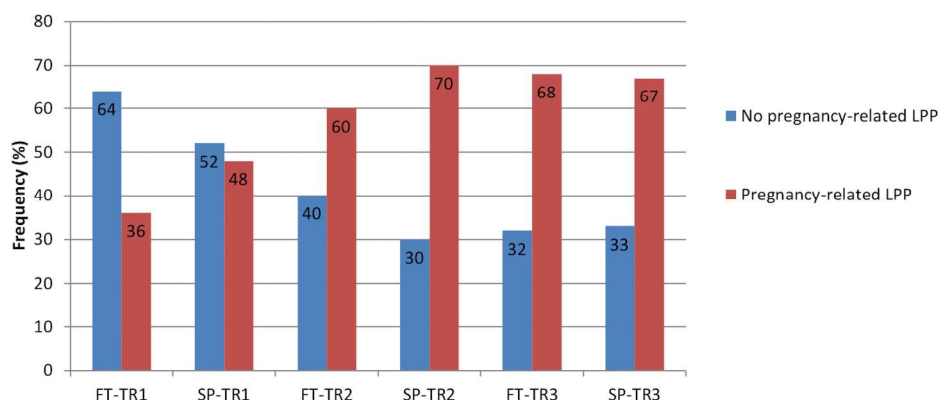

Prevalence of pregnancy-related lumbopelvic pain (LPP) in women who conceived spontaneously (SP) or after fertility treatments (FT) over the course of pregnancy.

263x132mm (300 x 300 DPI)

review only

1  
2  
3  
4  
5  
6  
7  
8  
9  
10  
11  
12  
13  
14  
15  
16  
17  
18  
19  
20  
21  
22  
23  
24  
25  
26  
27  
28  
29  
30  
31  
32  
33  
34  
35  
36  
37  
38  
39  
40  
41  
42  
43  
44  
45  
46  
47  
48  
49  
50  
51  
52  
53  
54  
55  
56  
57  
58  
59  
60

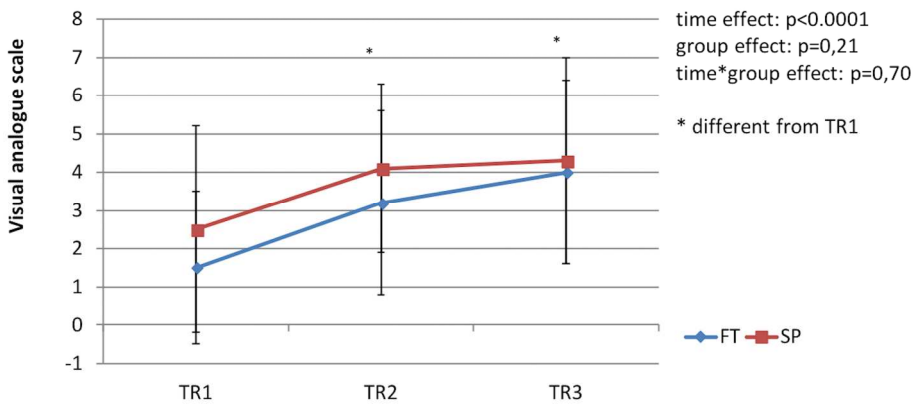

Evolution of pregnancy-related lumbopelvic pain (LPP) severity in women who conceived spontaneously (SP) or after fertility treatments (FT) over the course of pregnancy.

223x119mm (300 x 300 DPI)

review only



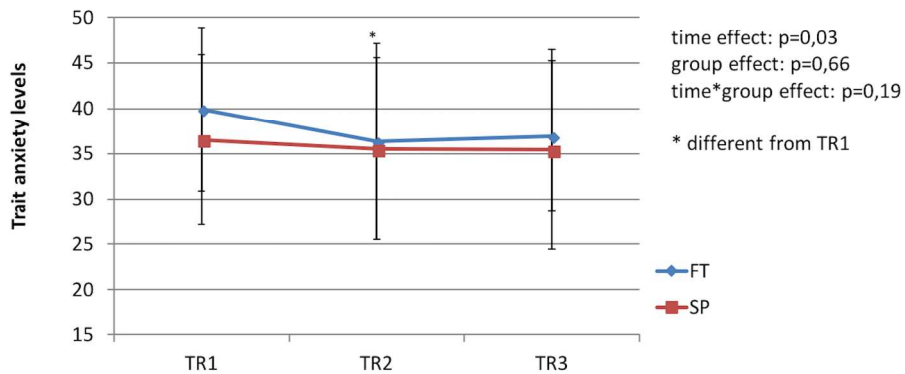

Evolution of trait anxiety in women who conceived spontaneously (SP) or after fertility treatments (FT) over the course of pregnancy.

227x101mm (300 x 300 DPI)

1  
2  
3  
4  
5  
6  
7  
8  
9  
10  
11  
12  
13  
14  
15  
16  
17  
18  
19  
20  
21  
22  
23  
24  
25  
26  
27  
28  
29  
30  
31  
32  
33  
34  
35  
36  
37  
38  
39  
40  
41  
42  
43  
44  
45  
46  
47  
48  
49  
50  
51  
52  
53  
54  
55  
56  
57  
58  
59  
60

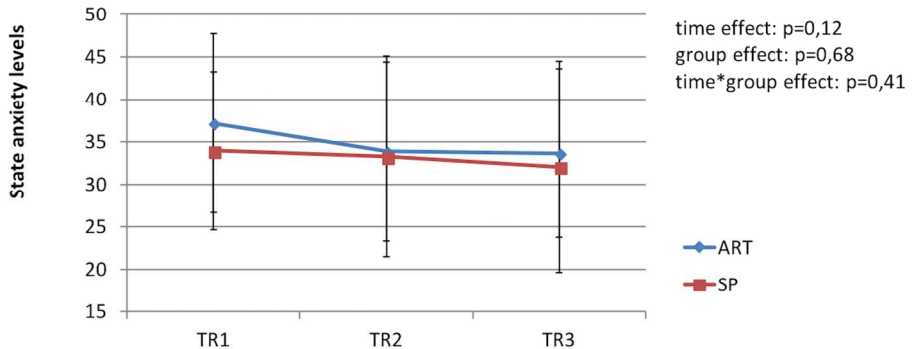

Evolution of state anxiety in women who conceived spontaneously (SP) or after fertility treatments (FT) over the course of pregnancy.

227x101mm (300 x 300 DPI)

er review only

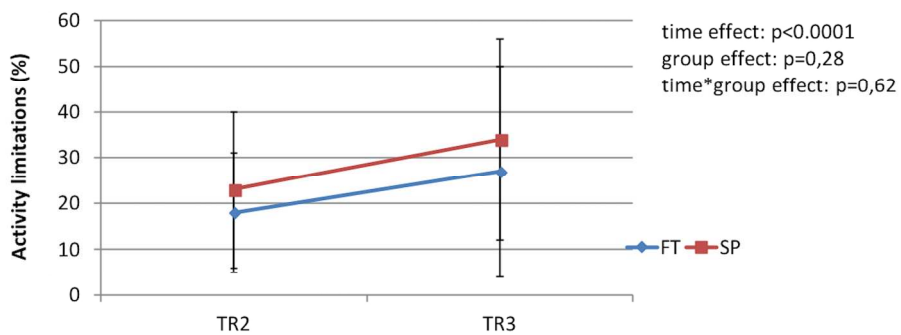

Evolution of activity limitations in women who conceived spontaneously (SP) or after fertility treatments (FT) over the course of pregnancy.

223x128mm (300 x 300 DPI)

review only

1  
2  
3  
4  
5  
6  
7  
8  
9  
10  
11  
12  
13  
14  
15  
16  
17  
18  
19  
20  
21  
22  
23  
24  
25  
26  
27  
28  
29  
30  
31  
32  
33  
34  
35  
36  
37  
38  
39  
40  
41  
42  
43  
44  
45  
46  
47  
48  
49  
50  
51  
52  
53  
54  
55  
56  
57  
58  
59  
60

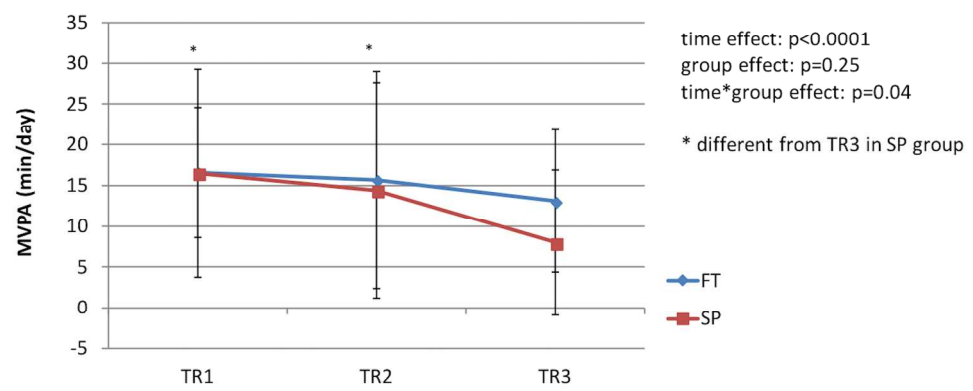

Evolution of daily moderate-to-vigorous physical activity (MVPA) in women who conceived spontaneously (SP) or after fertility treatments (FT) over the course of pregnancy.

227x104mm (300 x 300 DPI)

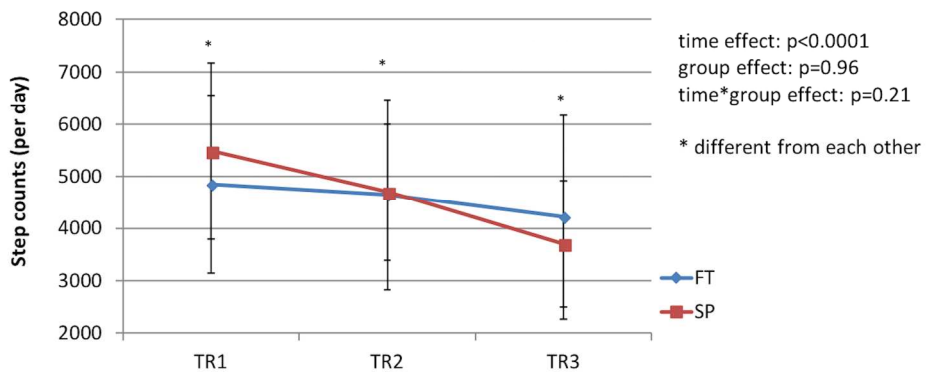

Evolution of daily step counts in women who conceived spontaneously (SP) or after fertility treatments (FT) over the course of pregnancy.

225x106mm (300 x 300 DPI)

1  
2  
3  
4  
5  
6  
7  
8  
9  
10  
11  
12  
13  
14  
15  
16  
17  
18  
19  
20  
21  
22  
23  
24  
25  
26  
27  
28  
29  
30  
31  
32  
33  
34  
35  
36  
37  
38  
39  
40  
41  
42  
43  
44  
45  
46  
47  
48  
49  
50  
51  
52  
53  
54  
55  
56  
57  
58  
59  
60

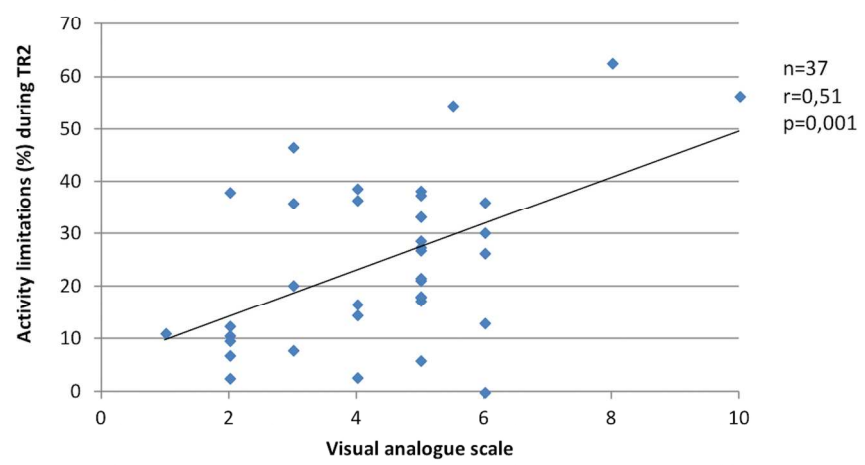

Correlation between the severity of pregnancy-related lumbopelvic pain (LPP) and activity limitations in the 2nd trimester of pregnancy (TR2).

232x133mm (300 x 300 DPI)

Review only

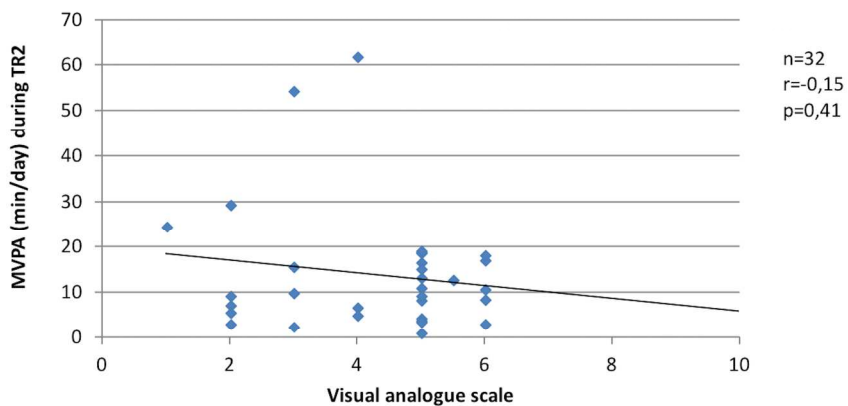

Correlation between the severity of pregnancy-related lumbopelvic pain (LPP) and daily moderate-to-vigorous physical activity (MVPA) in the 2nd trimester of pregnancy (TR2).

233x115mm (300 x 300 DPI)

review only

1  
2  
3  
4  
5  
6  
7  
8  
9  
10  
11  
12  
13  
14  
15  
16  
17  
18  
19  
20  
21  
22  
23  
24  
25  
26  
27  
28  
29  
30  
31  
32  
33  
34  
35  
36  
37  
38  
39  
40  
41  
42  
43  
44  
45  
46  
47  
48  
49  
50  
51  
52  
53  
54  
55  
56  
57  
58  
59  
60

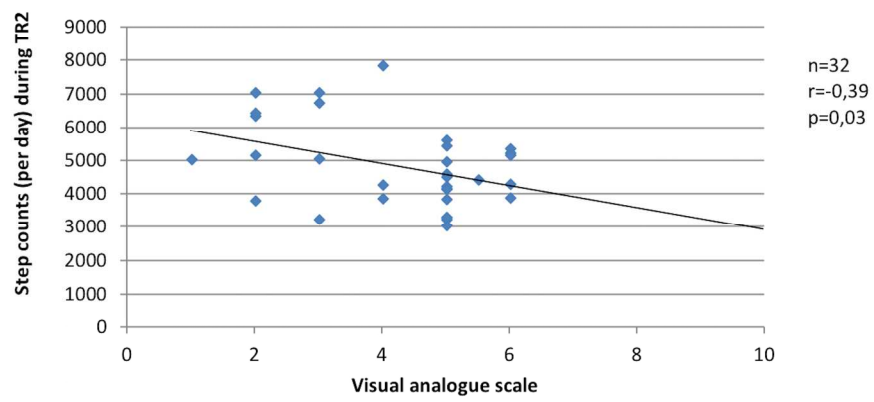

Correlation between the severity of pregnancy-related lumbopelvic pain (LPP) and daily step counts in the 2nd trimester of pregnancy (TR2).

234x109mm (300 x 300 DPI)

For peer review only



1  
2  
3  
4  
5  
6  
7  
8  
9  
10  
11  
12  
13  
14  
15  
16  
17  
18  
19  
20  
21  
22  
23  
24  
25  
26  
27  
28  
29  
30  
31  
32  
33  
34  
35  
36  
37  
38  
39  
40  
41  
42  
43  
44  
45  
46  
47  
48  
49  
50  
51  
52  
53  
54  
55  
56  
57  
58  
59  
60

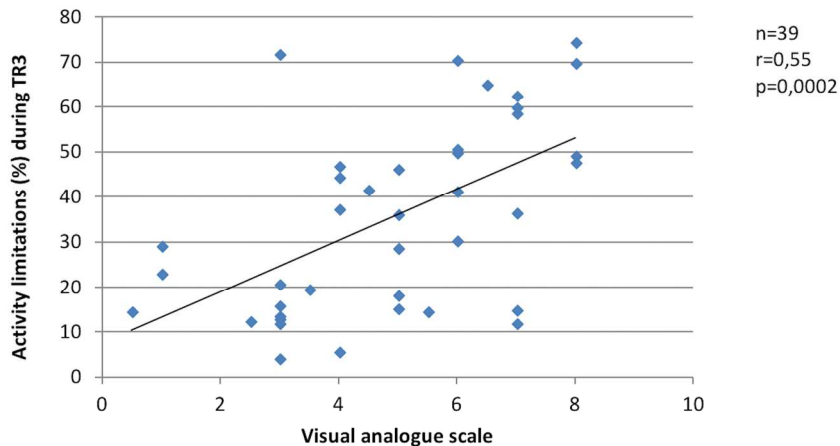

Correlation between the severity of pregnancy-related lumbopelvic pain (LPP) and activity limitations in the 3rd trimester of pregnancy (TR3).

227x129mm (300 x 300 DPI)

Review only

1  
2  
3  
4  
5  
6  
7  
8  
9  
10  
11  
12  
13  
14  
15  
16  
17  
18  
19  
20  
21  
22  
23  
24  
25  
26  
27  
28  
29  
30  
31  
32  
33  
34  
35  
36  
37  
38  
39  
40  
41  
42  
43  
44  
45  
46  
47  
48  
49  
50  
51  
52  
53  
54  
55  
56  
57  
58  
59  
60

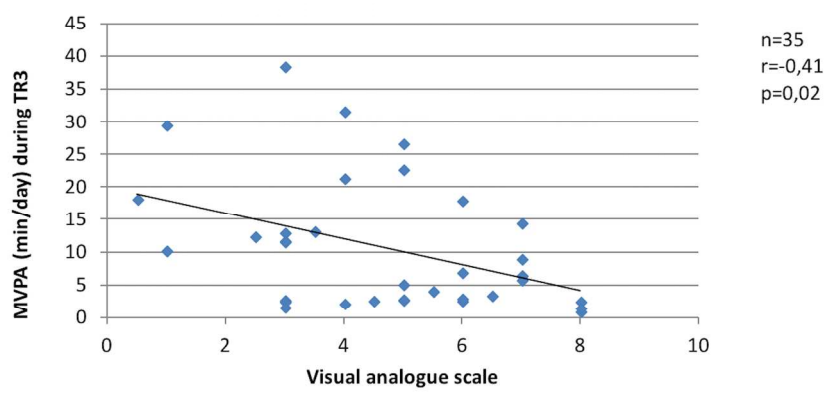

Correlation between the severity of pregnancy-related lumbopelvic pain (LPP) and daily moderate-to-vigorous physical activity (MVPA) in the 3rd trimester of pregnancy (TR3).

227x106mm (300 x 300 DPI)

For peer review only

1  
2  
3  
4  
5  
6  
7  
8  
9  
10  
11  
12  
13  
14  
15  
16  
17  
18  
19  
20  
21  
22  
23  
24  
25  
26  
27  
28  
29  
30  
31  
32  
33  
34  
35  
36  
37  
38  
39  
40  
41  
42  
43  
44  
45  
46  
47  
48  
49  
50  
51  
52  
53  
54  
55  
56  
57  
58  
59  
60

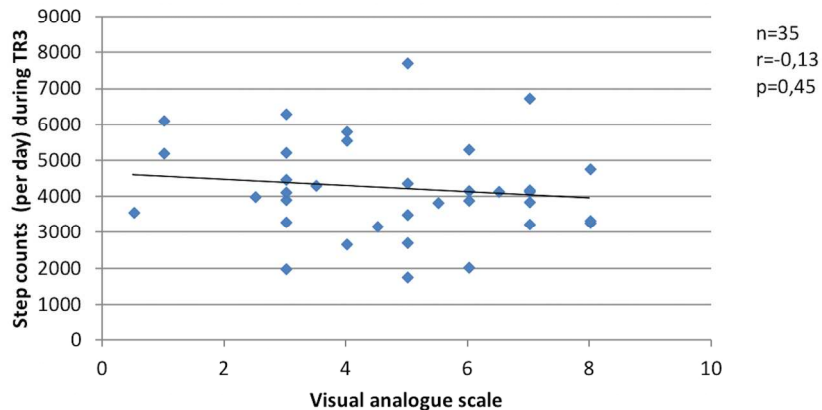

Correlation between the severity of pregnancy-related lumbopelvic pain (LPP) and daily step counts in the 3rd trimester of pregnancy (TR3).

226x116mm (300 x 300 DPI)

review only

**STROBE 2007 (v4) Statement—Checklist of items that should be included in reports of *cohort studies***

| Section/Topic                | Item # | Recommendation                                                                                                                                                                       | Reported on page # |
|------------------------------|--------|--------------------------------------------------------------------------------------------------------------------------------------------------------------------------------------|--------------------|
| <b>Title and abstract</b>    | 1      | (a) Indicate the study's design with a commonly used term in the title or the abstract                                                                                               | 1                  |
|                              |        | (b) Provide in the abstract an informative and balanced summary of what was done and what was found                                                                                  | 2                  |
| <b>Introduction</b>          |        |                                                                                                                                                                                      |                    |
| Background/rationale         | 2      | Explain the scientific background and rationale for the investigation being reported                                                                                                 | 4-5                |
| Objectives                   | 3      | State specific objectives, including any prespecified hypotheses                                                                                                                     | 5                  |
| <b>Methods</b>               |        |                                                                                                                                                                                      |                    |
| Study design                 | 4      | Present key elements of study design early in the paper                                                                                                                              | 5                  |
| Setting                      | 5      | Describe the setting, locations, and relevant dates, including periods of recruitment, exposure, follow-up, and data collection                                                      | 5-6                |
| Participants                 | 6      | (a) Give the eligibility criteria, and the sources and methods of selection of participants. Describe methods of follow-up                                                           | 5                  |
|                              |        | (b) For matched studies, give matching criteria and number of exposed and unexposed                                                                                                  | na                 |
| Variables                    | 7      | Clearly define all outcomes, exposures, predictors, potential confounders, and effect modifiers. Give diagnostic criteria, if applicable                                             | 6-7                |
| Data sources/<br>measurement | 8*     | For each variable of interest, give sources of data and details of methods of assessment (measurement). Describe comparability of assessment methods if there is more than one group | 6-7                |
| Bias                         | 9      | Describe any efforts to address potential sources of bias                                                                                                                            | -                  |
| Study size                   | 10     | Explain how the study size was arrived at                                                                                                                                            | -                  |
| Quantitative variables       | 11     | Explain how quantitative variables were handled in the analyses. If applicable, describe which groupings were chosen and why                                                         | 6-7                |
| Statistical methods          | 12     | (a) Describe all statistical methods, including those used to control for confounding                                                                                                | 7                  |
|                              |        | (b) Describe any methods used to examine subgroups and interactions                                                                                                                  | 7                  |
|                              |        | (c) Explain how missing data were addressed                                                                                                                                          | na                 |
|                              |        | (d) If applicable, explain how loss to follow-up was addressed                                                                                                                       | na                 |
|                              |        | (e) Describe any sensitivity analyses                                                                                                                                                | na                 |
| <b>Results</b>               |        |                                                                                                                                                                                      |                    |

|                          |     |                                                                                                                                                                                                              |                      |
|--------------------------|-----|--------------------------------------------------------------------------------------------------------------------------------------------------------------------------------------------------------------|----------------------|
| Participants             | 13* | (a) Report numbers of individuals at each stage of study—eg numbers potentially eligible, examined for eligibility, confirmed eligible, included in the study, completing follow-up, and analysed            | 8                    |
|                          |     | (b) Give reasons for non-participation at each stage                                                                                                                                                         | 8                    |
|                          |     | (c) Consider use of a flow diagram                                                                                                                                                                           | -                    |
| Descriptive data         | 14* | (a) Give characteristics of study participants (eg demographic, clinical, social) and information on exposures and potential confounders                                                                     | 8, 19 (table 1)      |
|                          |     | (b) Indicate number of participants with missing data for each variable of interest                                                                                                                          | na                   |
|                          |     | (c) Summarise follow-up time (eg, average and total amount)                                                                                                                                                  | 6                    |
| Outcome data             | 15* | Report numbers of outcome events or <b>summary measures over time</b>                                                                                                                                        | 8-9, 20-28 (figures) |
| Main results             | 16  | (a) Give unadjusted estimates and, if applicable, confounder-adjusted estimates and their precision (eg, 95% confidence interval). Make clear which confounders were adjusted for and why they were included | na                   |
|                          |     | (b) Report category boundaries when continuous variables were categorized                                                                                                                                    | na                   |
|                          |     | (c) If relevant, consider translating estimates of relative risk into absolute risk for a meaningful time period                                                                                             | na                   |
| Other analyses           | 17  | Report other analyses done—eg analyses of subgroups and interactions, and sensitivity analyses                                                                                                               | na                   |
| <b>Discussion</b>        |     |                                                                                                                                                                                                              |                      |
| Key results              | 18  | Summarise key results with reference to study objectives                                                                                                                                                     | 10-11                |
| <b>Limitations</b>       |     |                                                                                                                                                                                                              |                      |
| Interpretation           | 20  | Give a cautious overall interpretation of results considering objectives, limitations, multiplicity of analyses, results from similar studies, and other relevant evidence                                   | 12                   |
| Generalisability         | 21  | Discuss the generalisability (external validity) of the study results                                                                                                                                        | 12                   |
| <b>Other information</b> |     |                                                                                                                                                                                                              |                      |
| Funding                  | 22  | Give the source of funding and the role of the funders for the present study and, if applicable, for the original study on which the present article is based                                                | 14                   |

\*Give information separately for cases and controls in case-control studies and, if applicable, for exposed and unexposed groups in cohort and cross-sectional studies.

**Note:** An Explanation and Elaboration article discusses each checklist item and gives methodological background and published examples of transparent reporting. The STROBE checklist is best used in conjunction with this article (freely available on the Web sites of PLoS Medicine at <http://www.plosmedicine.org/>, Annals of Internal Medicine at <http://www.annals.org/>, and Epidemiology at <http://www.epidem.com/>). Information on the STROBE Initiative is available at [www.strobe-statement.org](http://www.strobe-statement.org).

# BMJ Open

## Lumbopelvic pain, anxiety, physical activity and mode of conception: A prospective cohort study of pregnant women

|                                 |                                                                                                                                                                                                                                                                                                                                                                                                                                                                                                      |
|---------------------------------|------------------------------------------------------------------------------------------------------------------------------------------------------------------------------------------------------------------------------------------------------------------------------------------------------------------------------------------------------------------------------------------------------------------------------------------------------------------------------------------------------|
| Journal:                        | <i>BMJ Open</i>                                                                                                                                                                                                                                                                                                                                                                                                                                                                                      |
| Manuscript ID                   | bmjopen-2018-022508.R2                                                                                                                                                                                                                                                                                                                                                                                                                                                                               |
| Article Type:                   | Research                                                                                                                                                                                                                                                                                                                                                                                                                                                                                             |
| Date Submitted by the Author:   | 28-Sep-2018                                                                                                                                                                                                                                                                                                                                                                                                                                                                                          |
| Complete List of Authors:       | Lardon, Emeline; Universite du Quebec a Trois-Rivieres; Institut Franco-Européen de Chiropraxie<br>St-Laurent, Audrey; Universite du Quebec a Trois-Rivieres<br>Babineau, Véronique; Department of Obstetrics and Gynaecology, Centre intégré universitaire de santé et de services sociaux de la Mauricie-et-du-Centre-du-Québec, affiliated to the University of Montreal<br>Descarreaux, M; Universite du Quebec, Human kinetics<br>Ruchat, Stephanie-May; Universite du Quebec a Trois-Rivieres, |
| <b>Primary Subject Heading</b>: | Obstetrics and gynaecology                                                                                                                                                                                                                                                                                                                                                                                                                                                                           |
| Secondary Subject Heading:      | Sports and exercise medicine                                                                                                                                                                                                                                                                                                                                                                                                                                                                         |
| Keywords:                       | pregnancy, fertility treatments, anxiety, physical activity, lumbopelvic pain                                                                                                                                                                                                                                                                                                                                                                                                                        |
|                                 |                                                                                                                                                                                                                                                                                                                                                                                                                                                                                                      |

SCHOLARONE™  
Manuscripts

Only

1  
2  
3 1 **Manuscript title:** Lumbopelvic pain, anxiety, physical activity and mode of conception: A  
4 2 prospective cohort study of pregnant women  
5

6 3  
7 4 Emeline Lardon<sup>1,2, \*</sup>, Audrey St-Laurent<sup>1</sup>, Véronique Babineau<sup>3</sup>, Martin Descarreaux<sup>1</sup>,  
8 5 Stephanie-May Ruchat<sup>1, \*</sup>  
9  
10

11 6  
12 7 **Authors Institutional Information**

13  
14 8 <sup>1</sup> Département de Human Kinetics, Université du Québec à Trois-Rivières, Trois-Rivières,  
15 9 Canada

16  
17 10 <sup>2</sup> Institut Franco-Européen de Chiropraxie, Paris, France

18  
19 11 <sup>3</sup> Département de Obstetrics and Gynaecology, Centre intégré universitaire de santé et de  
20 12 services sociaux de la Mauricie-et-du-Centre-du-Québec, affiliated to the University of  
21 13 Montreal, Trois-Rivières, Canada

22  
23 14 \* these authors contributed equally to the work  
24  
25

26  
27 16 **Corresponding author:**

28 17 Stephanie-May Ruchat, PhD,  
29 18 Professor, Department of Human Kinetics  
30 19 Université du Québec à Trois-Rivières  
31 20 3351, Boul Des Forges, Trois-Rivières, QC G9A 5H7  
32 21 E-mail : [stephanie-may.ruchat@uqtr.ca](mailto:stephanie-may.ruchat@uqtr.ca)  
33  
34  
35

36  
37 22  
38 23  
39 24 **Key words:** pregnancy; lumbopelvic pain; anxiety; physical activity; fertility treatments.  
40 25

41 26 **Word count:** 3636  
42  
43  
44  
45  
46  
47  
48  
49  
50  
51  
52  
53  
54  
55  
56  
57  
58  
59  
60

1  
2  
3 1 **ABSTRACT**

4  
5 2 **Objectives:** Pregnancy-related lumbopelvic pain (LPP) is a frequent condition known to  
6  
7 3 significantly affect women's daily life. The etiology of pregnancy-related LPP pain is still not  
8  
9 4 clearly established but the mode of conception has been suggested to contribute LPP. Anxiety  
10  
11 5 related to fertility treatments may be one of the contributing factors. The primary objectives  
12  
13 6 were to determine the evolution of LPP prevalence and severity, and anxiety, throughout  
14  
15 7 pregnancy in women who conceived spontaneously (SP) or after fertility treatments (FT). A  
16  
17 8 further aim was to examine the relationship between pregnancy-related LPP severity and  
18  
19 9 anxiety. The secondary objective was to determine the evolution of physical activity and their  
20  
21 10 correlation with the severity of pregnancy-related LPP.

22  
23  
24 11 **Design:** Prospective cohort study.

25  
26 12 **Setting:** Pregnant women were recruited through physicians' referrals, posters and newspaper  
27  
28 13 advertisements in the local and surrounding communities (hospital, maternity care clinic,  
29  
30 14 prenatal centers, sports centers, local university) in the city of Trois-Rivières, Canada.

31  
32 15 **Participants:** Fifty-nine pregnant women (33 SP and 26 FT) were assessed during the 1<sup>st</sup>, 2<sup>nd</sup>  
33  
34 16 and 3<sup>rd</sup> trimester of pregnancy.

35  
36 17 **Primary and secondary outcome measures:** Pregnancy-related LPP prevalence and severity  
37  
38 18 (primary), trait and state anxiety, and physical activity levels (secondary).

39  
40 19 **Results:** There was no relationship between the mode of conception and the outcome  
41  
42 20 measures. The prevalence and severity of LPP increased over the course of pregnancy (time  
43  
44 21 effect,  $p < 0.0001$ ) whereas trait anxiety decreased from early to mid-pregnancy (time effect,  
45  
46 22  $p = 0.03$ ). Activity limitations increased throughout pregnancy (time effect,  $p < 0.0001$ ) and  
47  
48 23 physical activity levels decreased (time effect,  $p < 0.0001$ ). The severity of LPP was positively  
49  
50 24 correlated with activity limitations ( $r = 0.51$  to  $0.55$ ) but negatively with physical activity  
51  
52 25 levels ( $r = -0.39$  to  $-0.41$ ).



1  
2  
3 1 **Conclusions:** Maternal health-related factors, such as LPP, anxiety and physical activity, are  
4  
5 2 not different in women who conceived spontaneously or after fertility treatments. The more  
6  
7 3 LPP was severe, the more the women were physically limited and inactive.  
8  
9 4

10  
11 5 **Strengths and limitations of this study**  
12

- 13  
14 6 • This is a prospective cohort study of pregnant women who were assessed at each  
15  
16 7 trimester of pregnancy, allowing to determine the evolution of several maternal health-  
17  
18 8 related factors that are known to change over the course of pregnancy;  
19  
20 9 • Primary and secondary outcomes were collected using validated tools;  
21  
22 10 • The low number of women who achieved a pregnancy following *in vitro* fertilization  
23  
24 11 prevented us to fully test our hypotheses; thus larger studies are needed to better  
25  
26 12 understand whether IVF contribute to pregnancy-related LPP.  
27  
28 13 • More than half of the participants had a university degree, which is not representative of  
29  
30 14 our local population. The results may therefore not be broadly generalizable.  
31  
32  
33  
34  
35  
36  
37  
38  
39  
40  
41  
42  
43  
44  
45  
46  
47  
48  
49  
50  
51  
52  
53  
54  
55  
56  
57  
58  
59  
60

## 1 INTRODUCTION

2 More than 50% of women experience pain in the lumbopelvic area during pregnancy <sup>1</sup>. Low  
3 back pain (LBP) is defined as pain localized below the ribs, but above the gluteal folds, with  
4 or without radiation down the legs <sup>2</sup>, whereas pelvic girdle pain (PGP) is defined as pain  
5 “experienced between the posterior iliac crest and the gluteal fold, particularly in the vicinity  
6 of the sacroiliac joints. The pain may radiate in the posterior thigh and can also occur in  
7 conjunction with/or separately in the symphysis” <sup>1</sup>. The term lumbopelvic pain (LPP) is used  
8 when no distinction is made between PGP and LBP <sup>3</sup>. Thus the wide range in the reported  
9 prevalence of LPP in the literature (45–73%) <sup>4,5</sup> has been attributed to the different criteria  
10 used to classify types and severity of pain, and the different periods during pregnancy LPP  
11 was assessed. The onset of LPP varies considerably, between the end of the first trimester to  
12 the first month post-delivery, with a peak of symptoms generally occurring between the 24th  
13 and 36th weeks of pregnancy <sup>6</sup>. Pregnancy-related LPP is a debilitating condition that is  
14 known to affect women’s quality of life <sup>7</sup>, with repercussions such as disruption of sleep,  
15 increased psychological stress, social and sexual life and work capacity <sup>4,7-10</sup>. Pregnant women  
16 experiencing LPP are also known to be less physically active during pregnancy <sup>11</sup>. Prenatal  
17 physical activity is an important component of a healthy pregnancy <sup>12</sup> and all women without  
18 contraindication to exercise are encouraged to be regularly active throughout pregnancy to  
19 benefit from it <sup>13,14</sup>. On the other hand, pregnancy-related LPP can contribute to maternal  
20 physical inactivity and its associated maternal, fetal and neonatal complications <sup>12</sup>.

21 Several factors are believed to be involved in pregnancy-related LPP development, such as  
22 degenerative metabolic, genetic, hormonal, and biomechanical factors/non-optimal joint  
23 stability <sup>16</sup>. Another factor of interest is the mode of conception, in other words, naturally or  
24 after fertility treatments. A study reported that pregnant women who underwent *in vitro*  
25 fertilization (IVF) treatments had a two times higher prevalence rate of sacral pain in early

1 and late pregnancy, as well as a higher frequency of positive results on pelvic pain  
2 provocation tests in late pregnancy<sup>15</sup>. The authors concluded that relaxin causes pelvic pain  
3 because relaxin is higher in IVF pregnancies<sup>16</sup>. Psychosocial factors may also be involved in  
4 the development of LPP. Higher anxiety levels experienced in women who conceived after  
5 IVF might contribute to the higher pregnancy-related LPP prevalence observed in these  
6 women. As reported by a systematic review, women who conceived following fertility  
7 treatments had greater pregnancy-specific anxiety than those who conceived naturally<sup>17</sup>.  
8 Based on a multi-center study including 1,158 women, higher levels of anxiety was reported  
9 to be among the most notable factors associated with a higher likelihood of reporting LBP<sup>18</sup>.  
10 However, to the best of our knowledge, no study has examined pregnancy-related LPP among  
11 women who achieve pregnancy naturally or after fertility treatment, and whether anxiety is a  
12 contributing factor to the development of LPP.

13 The primary objectives of this prospective cohort study were to determine the evolution of  
14 LPP prevalence and severity, as well as anxiety, over the course of pregnancy in women who  
15 conceived naturally or after fertility treatments, and to examine the possible relationship  
16 between pregnancy-related LPP severity and anxiety levels. As pregnancy-related LPP has a  
17 significant impact on the women's daily life, the secondary objective of our study was to  
18 determine the evolution of physical activity behaviors throughout pregnancy and whether the  
19 severity of LPP was correlated to these factors. Our primary hypotheses are that LPP  
20 prevalence and severity, as well as anxiety levels will increase over the course of pregnancy  
21 but more strongly in women who conceived after fertility treatments, and that pregnancy-  
22 related LPP severity will be positively correlated with anxiety levels. As a result, our  
23 secondary hypotheses are that activity limitations will increase whereas physical activity  
24 behaviors will decrease over the course of pregnancy but more significantly in women who

1 conceived after fertility treatments, and that the severity of pregnancy-related LPP will be  
2 positively correlated with activity limitations but negatively with physical activity behaviors.

### 3 **MATERIALS AND METHODS**

#### 4 **Study design and participants' selection**

5 This is a prospective cohort study of pregnant women who were recruited between October  
6 2015 and September 2016. Women who achieved a spontaneous pregnancy (SP group) and  
7 women who achieved pregnancy following fertility treatments (FT group) were recruited  
8 through physicians' and a clinic coordinator's referrals, posters and newspaper advertisements  
9 in the local and surrounding communities (hospital, maternity care clinic, prenatal centers,  
10 sports centers, local university) in the city of Trois-Rivières, Canada. Women under 14 weeks  
11 of gestation, with a singleton pregnancy and able to understand, speak and write French were  
12 considered eligible to participate in the study. The study was approved by the local Research  
13 Ethics Committees (CER-2015-003 and CER-15-214-07.10) and all participants provided  
14 their written informed consent.

#### 16 **Outcome measures and measurement tools**

17 Women were followed from the 1<sup>st</sup> trimester of pregnancy until delivery through three  
18 evaluations (1<sup>st</sup> trimester [TR1]: 10–16 weeks, 2<sup>nd</sup> trimester [TR2]: 24–28 weeks and 3<sup>rd</sup>  
19 trimester [TR3]: 32–36 weeks of gestation). In each trimester, a member of the research team  
20 asked the women if they have had pregnancy-related LPP over the last 7 days or if they were  
21 having LPP presently using the illustration provided in the French version of the Pelvic Girdle  
22 Questionnaire (PGQ) <sup>19</sup>. If a woman had or was having pregnancy-related LPP, she was asked  
23 to rate pain intensity using a visual analog pain scale (VAS). This scale is a self-reported  
24 measurement tool used by health professionals allowing the patient to rate pain from 0 (no  
25 pain) to 10 (extreme pain) <sup>20</sup>.

1 The levels of anxiety was assessed during TR1, TR2 and TR3 using the French-Canadian  
2 version <sup>21</sup> of the State-Trait Anxiety Inventory (STAI) <sup>22</sup>. The STAI is a self-reported  
3 questionnaire assessing the presence and severity of current symptoms of anxiety (state  
4 anxiety scale) and a generalized propensity to be anxious (trait anxiety scale). Each scale  
5 comprises 20 items rated with a 4-level Likert scale. The range of score for each scale is 20-  
6 80, the higher score indicating greater anxiety levels. The STAI has been widely used in  
7 research with pregnant women and it does reflect the anxiety-related experiences of pregnant  
8 women. Its use with pregnant women is therefore appropriate <sup>23</sup>.

9 Activity limitations and symptoms associated with pregnancy-related LPP were assessed in  
10 TR2 and TR3 using the completed the French-Canadian version of the PGQ was used <sup>19</sup>. The  
11 PGQ is a condition-specific measure developed for pregnant and postpartum women. It  
12 consists of 20 activity items and five symptom items on a four-point response scale and  
13 assesses activity limitations and symptoms associated with pain in the lumbopelvic region.  
14 The range of score is 0-100%, with a higher score indicating greater activity limitations and  
15 symptoms. The PGQ is reliable and valid for both pregnant and postpartum women with  
16 pregnancy-related LPP <sup>24</sup>.

17 Finally, physical activity levels were objectively measured at each trimester of pregnancy  
18 using the ActiGraph GT3X (ActiGraph, Pensacola, FL), a triaxial accelerometer measuring  
19 data in a 60-s epoch. The women were instructed to wear the monitor over the hip on an  
20 elastic belt for seven consecutive days from wake-up time to bedtime. They were allowed to  
21 remove the accelerometer when sleeping, showering or engaging in water activities.  
22 Furthermore, the women received a daily diary to document wear and non-wear time periods  
23 and water activities. According to the method used in the Canadian Health Measures Survey,  
24 valid data were defined as four days or more of monitoring for 10 hours or more of wear time  
25 per day <sup>25</sup>. Pregnant women were encouraged to maintain their usual activities. Data were

1 processed using the Actilife software version 6.13.2 (ActiGraph, LLC, FL, USA). The  
2 accelerometer data obtained were averaged across valid wear days. To derive the activity  
3 frequency, intensity and duration of the measured activity in counts per minute per day, the  
4 Freedson equation was used: sedentary (<100 counts), light (100–1951 counts), moderate  
5 (1952–5724), vigorous (5725–9498), and very vigorous (>9498) <sup>26</sup>, as previously used in  
6 pregnant women <sup>27</sup>. Non-wear time was defined as a period of zero counts for  $\geq 60$   
7 consecutive minutes, admitting a maximum of two consecutive minutes between 1 and 100  
8 counts/min. When a third observation was between 1 and 100 counts or one observation was  
9 more than 100 counts, the non-wear period was ended. Bouts of moderate-to-vigorous  
10 physical activity (MVPA) was defined as a minimum of 10 consecutive minutes above 1952  
11 counts and ended with more than two consecutive records below this threshold.

### 12 **Patient and Public Involvement**

13 Patients and public were not involved in the design and conduct of this study. The results will  
14 not be disseminated to study participants.

### 15 **Statistical analysis**

16 Means and standard deviations, as well as percentages, were computerized for variables of  
17 interest. Student t-test was used to compare socio-demographic and anthropometric  
18 characteristics between SP and FT women. For categorical variables, the  $\chi$  square test was  
19 used. The MIXED procedure of SAS was used to test the effect of time (trimesters), group  
20 (SP and FT women) and potential interaction effects on the outcome measures (i.e. the  
21 severity of pregnancy-related LPP and anxiety levels [objective 1], and physical activity  
22 behaviors [objective 2]). The assumption of sphericity was tested using Mauchly's Test of  
23 Sphericity. Variables that did not meet the sphericity assumption were analyzed following a  
24 Geisser Greenhouse correction. When a significant effect of time, group or interaction effect  
25  
26

1 was found, post-hoc analyses were conducted using the Tukey test. To test whether the  
2 severity of pregnancy-related LPP was correlated to the levels of anxiety (objective 1), and  
3 physical activity behaviors (objective 2) at each trimester of pregnancy, Pearson's correlation  
4 analyses were used. Statistical analyses were performed by using the SAS software (Institute,  
5 Cary, NC, version 9.4) and the level of significance was set to  $p\text{-value} \leq 0.05$ .

## 7 RESULTS

8 Between October 2015 and September 2016, the study was presented by physicians to 117  
9 eligible pregnant women, among which 62 women accepted to participate. Reasons for not  
10 agreeing to participate to the study were lack of interest or lack of time. Three women (1 in  
11 SP group and 2 in FT group) were excluded due to loss to follow-up (n=1), miscarriage (n=1)  
12 or missing data (n=1), leaving 59 women (33 SP and 26 FT) for the statistical analyses.

13 The characteristics of pregnant women are presented in **Table 1**. No significant difference in  
14 socio-demographic and pre-pregnancy anthropometric characteristics was found between the  
15 groups ( $p > 0.05$ ). Women were on average in their early thirties and approximately half of  
16 them were nulliparous. More than half were of normal weight pre-pregnancy (BMI 18.5-24.9  
17  $\text{kg/m}^2$ ) and had a university degree. Women's LPP history, related or not to a previous  
18 pregnancy, was also similar between the groups, with approximately 50% of the women  
19 reporting a history of LPP (**Table 1**). Finally, the prevalence and severity of pregnancy-  
20 related LPP, anxiety and physical activity levels were not different between SP and FT  
21 pregnant women at study entry (**Table 1**). Data showed that on average, women considered  
22 LPP as moderate (4/10) and were slightly anxious (35/80). Moreover, based on daily steps  
23 and physical activity recommendations<sup>28 29</sup>, our population was considered inactive.

24 In our study, a total of 8 (13.5%), 8 (13.5%) and 9 (15%) women removed the accelerometer  
25 to do water activities (aqua gym, swimming or bathing) during TR1, TR2 and TR3,

1 respectively. The accelerometer was removed between 1 and 5 times during the evaluation  
2 period, and for 10 to 225 minutes. Furthermore, physical activity data was missing for 10  
3 (17%), 7 (12%) and 8 (14%) women at TR1, TR2 and TR3, respectively, because those  
4 women did not wear the accelerometer for at least 10 hours per day for at least four days.

5 The prevalence of pregnancy-related LPP was similar in both groups during each trimester of  
6 pregnancy (TR1:  $\chi^2 = 2.19$ ,  $p=0.33$ ; TR2:  $\chi^2 = 2.13$ ,  $p=0.33$ ; TR3:  $\chi^2 = 0.01$ ,  $p=0.92$ ); the  
7 pooled prevalence increased from 42% during TR1 to 65% during TR2 to 68% during TR3  
8 ( $\chi^2 = 8.45$ ;  $p=0.01$ ) (**Fig 1**). Among women presenting with pregnancy-related LPP at one  
9 time point during pregnancy ( $n=44$ , 26 SP and 18 FT), pain severity significantly increased  
10 over the course of pregnancy in both groups (time effect:  $F=14.81$ ,  $p<0.0001$ . **Fig 2**), with  
11 pain severity being significantly higher during TR2 and TR3 compared to TR1. Trait anxiety  
12 decreased over the course of pregnancy in both groups (time effect:  $F=3.93$ ,  $p<0.03$ . **Fig 3**),  
13 with lower levels during TR2 compared to TR1, whereas state anxiety did not significantly  
14 change (**Fig 4**). Finally, activity limitations associated with pregnancy-related LPP increased  
15 (time effect:  $F=18.82$ ,  $p<0.0001$ . **Fig 5**) whereas daily steps decreased over the course of  
16 pregnancy in both groups (time effect:  $F=16.03$ ,  $p<0.0001$ . **Fig 6**). The only time by group  
17 interaction effect was found for daily MVPA (time effect:  $F=13.11$ ,  $p<0.0001$ ; time\*group  
18 interaction effect:  $F=3.38$ ,  $p=0.04$ . **Fig 7**), with daily MVPA being lower in TR3 compared to  
19 TR1 and TR2 only in SP women.

20 Since changes in the severity of pregnancy-related LPP, levels of anxiety, and physical  
21 activity behaviors were similar between the groups, result from SP and FT women were  
22 pooled in the correlation analyses. Among women who presented with pregnancy-related  
23 LPP, no correlation was found during TR1 between the severity of pregnancy-related LPP  
24 and anxiety or physical activity levels. During TR2, the severity of pregnancy-related LPP  
25 was positively correlated with activity limitations ( $r=0.51$ ,  $p=0.001$ , **Fig 8**) but negatively



1 with daily steps ( $r=-0.39$ ,  $p=0.03$ , **Fig 9**). No correlation was found with daily MVPA (**Fig**  
2 **10**). During TR3, we found a positive correlation between the severity of pregnancy-related  
3 LPP and activity limitations ( $r=0.55$ ,  $p=0.0002$ , **Fig 11**) and a negative correlation with daily  
4 MVPA ( $r=-0.41$ ,  $p=0.02$ , **Fig 12**). No correlation was found with daily steps (**Fig 13**).

## 6 **DISCUSSION**

7 To the best of our knowledge, this is the first cohort study assessing the course of pregnancy-  
8 related LPP prevalence and severity in pregnant women who conceived naturally and after  
9 fertility treatments, and possible association with anxiety levels and physical activity  
10 behaviors. Overall, our primary results showed no differences in LPP prevalence and severity,  
11 or anxiety levels between women who achieved a pregnancy naturally or after fertility  
12 treatments. As expected, the prevalence and severity of LPP increased over the course of  
13 pregnancy and were of similar magnitude than that reported in previous studies<sup>10,18</sup>. Anxiety  
14 levels decreased from early to mid-pregnancy and were not correlated to the severity of LPP.  
15 Only one study examined the evolution of the prevalence and severity of pregnancy-related  
16 PGP (PPGP) according to the mode of conception<sup>15</sup>. This study was conducted in 31 women  
17 who conceived after IVF and 200 women who conceived spontaneously and assessed PGP at  
18 12, 24 and 34 weeks of pregnancy. The authors found an increase in PPGP prevalence and  
19 severity over the course of pregnancy in all women, as we and other authors did<sup>30</sup>. However,  
20 they reported a two times higher rate of PPGP in early and late pregnancy in women who  
21 achieved a pregnancy after IVF compared to those who achieved a pregnancy naturally but  
22 similar severity of PPGP<sup>15</sup>. Importantly, many IVF women carried multiple pregnancies in  
23 that study. Given that relaxin levels are higher after IVF<sup>16</sup> and that the number of fetuses is  
24 higher after IVF, and given that the mechanical load is higher in twin pregnancies, it is  
25 difficult to establish what causes higher rates of PPGP after IVF in this previous study.

1 Our hypothesis was that higher anxiety levels reported in women who conceived after fertility  
2 treatments <sup>17</sup> would contribute to higher pregnancy-related LPP prevalence and severity in  
3 this population of pregnant women. However, we did not find any difference in anxiety levels  
4 between women who conceived after fertility treatments and those who conceived naturally.  
5 Several reasons may explain our result. First, the majority of women included in our sample  
6 conceived after ovarian stimulation (OS, n=7) or intrauterine insemination (IUI, n=12),  
7 whereas the majority of studies included in Gourounti's review reporting higher anxiety in  
8 women who conceived following fertility treatments were conducted in the context of IVF <sup>17</sup>.  
9 Because the medical surveillance is more frequent and the procedure more invasive in the  
10 context of IVF, it is likely that IVF generates more anxiety than OS and IUI. This might  
11 partially explain why we found no differences in anxiety levels in our sample.  
12 When examining anxiety levels over the course of pregnancy, we found a U-shaped curve,  
13 with a significant decrease in anxiety from TR1 to TR2 and a non-significant trend toward an  
14 increase from TR2 to TR3. These findings are similar to those of previous studies <sup>31 32</sup>. In  
15 contrast, whereas some studies reported higher anxiety in pregnant women with LBP or PGP  
16 <sup>18 33</sup>, we found no correlation between anxiety levels and LPP severity. Our findings suggest  
17 that in our sample, anxiety and LPP were two independent phenomena.  
18 Likewise, our secondary results showed no relationship between the mode of conception and  
19 physical limitations and physical activity behaviors, except for MVPA during TR3. The  
20 decrease in MVPA observed only in women who conceived naturally needs further  
21 investigation. Similarly to previous studies <sup>34-37</sup>, we found that with advancing pregnancy,  
22 physical limitations increased <sup>36-38</sup> and physical activity behaviors decreased <sup>34 35 39</sup>. Our data  
23 further showed that the greater pregnancy-related LPP severity the greater physical limitation  
24 and lower physical activity levels in mid- and late pregnancy. These results are also in

1  
2  
3 1 accordance with previous studies reporting decreased physical activity levels as physical  
4  
5 2 limitations and low back pain increase with advancing pregnancy<sup>36 40</sup>.

6  
7 3

#### 8 4 **Limitations**

9 5 The strength of our study is its longitudinal design that allowed us to examine the evolution of  
10  
11 6 several maternal health-related factors that are known to change over the course of pregnancy,  
12  
13 7 in the context of spontaneous pregnancies and pregnancies achieved following FT. Moreover,  
14  
15 8 our study adds knowledge about the relationship between pregnancy-related LPP severity and  
16  
17 9 physical activity behaviors. However, the current study has limitations that should be  
18  
19 10 acknowledged. First, our sample was heterogeneous with regards to fertility treatments used  
20  
21 11 to achieve a pregnancy, with the majority of women having conceived after OS or IUI. This  
22  
23 12 may explain the lower prevalence of PPGP and anxiety levels in women who conceived after  
24  
25 13 fertility treatments. The low number of women who achieved a pregnancy following IVF  
26  
27 14 prevented us to fully test our hypotheses and further larger studies are needed to better  
28  
29 15 understand whether IVF contribute to pregnancy-related. Second, more than half of the  
30  
31 16 women we recruited had a university degree, which is more than in our local population  
32  
33 17 (22.5%)<sup>41</sup>. This suggests a possible recruitment bias and limits the generalizability of our  
34  
35 18 results. Third, although accelerometers provide a valid and objective measure of physical  
36  
37 19 activity levels, non-waterproof accelerometers underestimate several types of physical  
38  
39 20 activity, such as water activities. In our data set, several women removed the accelerometer to  
40  
41 21 do water activities (aqua gym, swimming or bathing) during TR1, TR2 and TR3, suggesting  
42  
43 22 that we possibly underestimated the level of physical activity of these women. We also had  
44  
45 23 missing physical activity data because some women did not wear the accelerometer for at  
46  
47 24 least 10 hours per day for at least four days. Finally, physical activity levels were assessed  
48  
49 25 only for a seven-day period during each trimester of pregnancy. Given that each trimester  
50  
51 26 lasts for more than a week, the data obtained and the results reported in relation to physical  
52  
53  
54  
55  
56  
57  
58  
59  
60

1 activity levels do not truly reflect the evolution of physical activity levels over each trimester  
2 and over the entire course of pregnancy. Nevertheless, the majority of the women stated in the  
3 daily diary that their physical activity behavior over the seven-day period of evaluation  
4 reflected their habitual behaviors.

## 6 **CONCLUSION**

7 In conclusion, our findings suggest that maternal health-related factors, such as LPP, anxiety  
8 and physical activity behaviors, are not different in women who conceived after fertility  
9 treatments and those who conceived spontaneously. The lack of correlation between the  
10 severity of pregnancy-related LPP and anxiety levels suggests that they are two independent  
11 phenomena. The increase in LPP severity and activity limitations, and decrease in physical  
12 activity behaviors with advancing gestation, and the fact that the more severe LPP the greater  
13 activity limitations and physical inactivity in mid- and late pregnancy underline the  
14 importance of pregnancy-related LPP management to allow pregnant women performing their  
15 daily activities.

1  
2  
3 1 **Acknowledgments:** The authors would like to acknowledge and thank Sophie Drouin, the  
4  
5 2 coordinator of the fertility clinic, as well as the medical team who assisted with the  
6  
7 3 recruitment, and all the women who participated to the project.  
8  
9 4

10  
11 5 **Funding:** This study was funded by a start-up grant from the Univeristé du Québec à Trois-  
12  
13 6 Rivières (Institutional funds for research).  
14  
15 7

16  
17  
18 8 **Declaration of conflicting interests:** The authors declare that there is no conflict of interest.  
19  
20 9

21  
22 10 **Author Contributions:** SMR, MD, VB contributed to the study concept and design; EL and  
23  
24 11 AStL acquired the data; SMR, MD, EL performed the statistical analysis and interpreted the  
25  
26 12 data; EL and SMR drafted the manuscript; MD, AStL and VB critically reviewed the  
27  
28 13 manuscript for important intellectual content. All authors read and approved the final  
29  
30 14 manuscript.  
31  
32 15

33  
34  
35 16 **Competing interests:** None declared.  
36  
37 17

38  
39 18 **Ethics approval:** The study was approved by the local Research Ethics Committees (CER-  
40  
41 19 2015-003 and CER-15-214-07.10)  
42  
43 20

44  
45  
46 21 **Data sharing statement:** No additional data are available.  
47  
48 22  
49  
50  
51  
52  
53  
54  
55  
56  
57  
58  
59  
60



- 1  
2  
3 1 12. Mudd LM, Owe KM, Mottola MF, et al. Health benefits of physical activity during  
4 2 pregnancy: an international perspective. *Med Sci Sports Exerc* 2013;45(2):268-77. doi:  
5 3 10.1249/MSS.0b013e31826cebc [published Online First: 2012/08/17]  
6  
7 4 13. Davies GA, Wolfe LA, Mottola MF, et al. Exercise in pregnancy and the postpartum  
8 5 period. *Journal of obstetrics and gynaecology Canada : JOGC = Journal d'obstetrique et*  
9 6 *gynecologie du Canada : JOGC* 2003;25(6):516-29. [published Online First: 2003/06/14]  
11  
12 7 14. ACOG Committee Opinion No. 650: Physical Activity and Exercise During Pregnancy  
13 8 and the Postpartum Period. *Obstet Gynecol* 2015;126(6):e135-42. doi:  
14 9 10.1097/aog.0000000000001214 [published Online First: 2015/11/26]  
15  
16 10 15. Kristiansson P, Nilsson-Wikmar L, von Schoultz B, et al. Back pain in in-vitro fertilized  
17 11 and spontaneous pregnancies. *Hum Reprod* 1998;13(11):3233-8. [published Online First:  
18 12 1998/12/16]  
19  
20 13 16. Kristiansson P, Svardsudd K, von Schoultz B, et al. Supraphysiological serum relaxin  
21 14 concentration during pregnancy achieved by in-vitro fertilization is strongly correlated to the  
22 15 number of growing follicles in the treatment cycle. *Hum Reprod* 1996;11(9):2036-40.  
23  
24 16 17. Gourounti K. Psychological stress and adjustment in pregnancy following assisted  
25 17 reproductive technology and spontaneous conception: A systematic review. *Women Health*  
26 18 2015:1-21. doi: 10.1080/03630242.2015.1074642 [published Online First: 2015/07/28]  
27  
28 19 18. Kovacs FM, Garcia E, Royuela A, et al. Prevalence and factors associated with low back  
29 20 pain and pelvic girdle pain during pregnancy: a multicenter study conducted in the Spanish  
30 21 National Health Service. *Spine (Phila Pa 1976)* 2012;37(17):1516-33. doi:  
31 22 10.1097/BRS.0b013e31824dcb74 [published Online First: 2012/02/16]  
32  
33 23 19. Girard MP, Marchand AA, Stuge B, et al. Cross-cultural Adaptation of the Pelvic Girdle  
34 24 Questionnaire for the French-Canadian Population. *J Manipulative Physiol Ther*  
35 25 2016;39(7):494-9. doi: 10.1016/j.jmpt.2016.06.002 [published Online First: 2016/08/19]  
36  
37 26 20. Ostelo RW, Deyo RA, Stratford P, et al. Interpreting change scores for pain and  
38 27 functional status in low back pain: towards international consensus regarding minimal  
39 28 important change. *Spine (Phila Pa 1976)* 2008;33(1):90-4. doi:  
40 29 10.1097/BRS.0b013e31815e3a10 [published Online First: 2008/01/01]  
41  
42 30 21. Gauthier J, Bouchard S. Adaptation canadienne-française de la forme révisée du State-  
43 31 Trait Anxiety Inventory de Spielberg. *Canadian Journal of Behavioral Sciences* 1990;25  
44 32 (4):559-89. [published Online First: 1993/10]  
45  
46 33 22. Spielberger CD. Manual for the State-Trait Anxiety Inventory (Form Y): Palo Alto:  
47 34 Consulting Psychologist Press 1983.



- 1  
2  
3 1 23. Gunning MD, Denison FC, Stockley CJ, et al. Assessing maternal anxiety in pregnancy  
4 2 with the State - Trait Anxiety Inventory (STAI): issues of validity, location and participation.  
5 3 *Journal of Reproductive and Infant Psychology* 2010;28(3):266-73.  
6  
7  
8 4 24. Stuge B, Garratt A, Krogstad Jenssen H, et al. The pelvic girdle questionnaire: a  
9 5 condition-specific instrument for assessing activity limitations and symptoms in people with  
10 6 pelvic girdle pain. *Phys Ther* 2011;91(7):1096-108. doi: 10.2522/ptj.20100357 [published  
11 7 Online First: 2011/05/21]  
12  
13 8 25. Colley RC, Garriguet D, Janssen I, et al. Activité physique des adultes au Canada:  
14 9 résultats d'accélérométrie de l'Enquête Canadienne sur les mesures de la santé de 2007-2009.  
15 10 *Statistique Canada Rapports sur la santé* 2011  
16  
17  
18 11 26. Freedson PS, Melanson E, Sirard J. Calibration of the Computer Science and  
19 12 Applications, Inc. accelerometer. *Med Sci Sports Exerc* 1998;30(5):777-81. [published Online  
20 13 First: 1998/05/20]  
21  
22  
23 14 27. Harrison CL, Thompson RG, Teede HJ, et al. Measuring physical activity during  
24 15 pregnancy. *Int J Behav Nutr Phys Act* 2011;8:19. doi: 10.1186/1479-5868-8-19  
25  
26 16 28. Tudor-Locke C, Bassett DR, Jr. How many steps/day are enough? Preliminary pedometer  
27 17 indices for public health. *Sports Med* 2004;34(1):1-8.  
28  
29  
30 18 29. Evenson KR, Mottola MF, Owe KM, et al. Summary of international guidelines for  
31 19 physical activity after pregnancy. *Obstet Gynecol Surv* 2014;69(7):407-14. doi:  
32 20 10.1097/OGX.0000000000000077  
33  
34 21 30. Kristiansson P, Svardsudd K, von Schoultz B. Back pain during pregnancy: a prospective  
35 22 study. *Spine (Phila Pa 1976)* 1996;21(6):702-9. [published Online First: 1996/03/15]  
36  
37  
38 23 31. Lee AM, Lam SK, Sze Mun Lau SM, et al. Prevalence, course, and risk factors for  
39 24 antenatal anxiety and depression. *Obstet Gynecol* 2007;110(5):1102-12. doi:  
40 25 10.1097/01.AOG.0000287065.59491.70  
41  
42  
43 26 32. Teixeira C, Figueiredo B, Conde A, et al. Anxiety and depression during pregnancy in  
44 27 women and men. *J Affect Disord* 2009;119(1-3):142-8. doi: 10.1016/j.jad.2009.03.005  
45 28 [published Online First: 2009/04/07]  
46  
47  
48 29 33. Elden H, Gutke A, Kjellby-Wendt G, et al. Predictors and consequences of long-term  
49 30 pregnancy-related pelvic girdle pain: a longitudinal follow-up study. *BMC Musculoskelet*  
50 31 *Disord* 2016;17:276. doi: 10.1186/s12891-016-1154-0  
51  
52 32 34. Evenson KR, Wen F. Prevalence and correlates of objectively measured physical activity  
53 33 and sedentary behavior among US pregnant women. *Prev Med* 2011;53(1-2):39-43. doi:  
54 34 10.1016/j.ypmed.2011.04.014  
55  
56  
57  
58  
59  
60



- 1  
2  
3 1 35. Rousham EK, Clarke PE, Gross H. Significant changes in physical activity among  
4 2 pregnant women in the UK as assessed by accelerometry and self-reported activity. *Eur J Clin*  
5 3 *Nutr* 2006;60(3):393-400.  
6  
7  
8 4 36. Cramp AG, Bray SR. A prospective examination of exercise and barrier self-efficacy to  
9 5 engage in leisure-time physical activity during pregnancy. *Ann Behav Med* 2009;37(3):325-  
10 6 34. doi: 10.1007/s12160-009-9102-y  
11  
12 7 37. Robinson HS, Veierod MB, Mengshoel AM, et al. Pelvic girdle pain--associations  
13 8 between risk factors in early pregnancy and disability or pain intensity in late pregnancy: a  
14 9 prospective cohort study. *BMC Musculoskelet Disord* 2010;11:91. doi: 10.1186/1471-2474-  
15 10 11-91  
16  
17  
18 11 38. Chang HY, Lai YH, Jensen MP, et al. Factors associated with low back pain changes  
19 12 during the third trimester of pregnancy. *J Adv Nurs* 2014;70(5):1054-64. doi:  
20 13 10.1111/jan.12258  
21  
22  
23 14 39. Downs DS, LeMasurier GC, DiNallo JM. Baby steps: pedometer-determined and self-  
24 15 reported leisure-time exercise behaviors of pregnant women. *J Phys Act Health* 2009;6(1):63-  
25 16 72.  
26  
27 17 40. Poston L, Briley AL, Barr S, et al. Developing a complex intervention for diet and activity  
28 18 behaviour change in obese pregnant women (the UPBEAT trial); assessment of behavioural  
29 19 change and process evaluation in a pilot randomised controlled trial. *BMC Pregnancy*  
30 20 *Childbirth* 2013;13:148. doi: 10.1186/1471-2393-13-148  
31  
32  
33 21 41. Statistics Canada. Labour Force Survey, special compilation, adapted by the Institut de la  
34 22 statistique du Québec., July 14, 2017.  
35 23  
36  
37 24  
38  
39  
40  
41  
42  
43  
44  
45  
46  
47  
48  
49  
50  
51  
52  
53  
54  
55  
56  
57  
58  
59  
60

1 **Table 1:** Baseline characteristics of the 59 pregnant women included in study.

| Variables                                                    | FT<br>(n=26)<br>Means $\pm$ SD | SP<br>(n=33)<br>Means $\pm$ SD | P values |
|--------------------------------------------------------------|--------------------------------|--------------------------------|----------|
| Fertility treatments                                         | OS=7<br>IUI=12<br>IVF=7        | -                              |          |
| Age (years)                                                  | 32.2 $\pm$ 3.6                 | 30.9 $\pm$ 4.2                 | 0.23     |
| Parity                                                       | 0.4 $\pm$ 0.6                  | 0.6 $\pm$ 0.6                  | 0.36     |
| 0 (n)                                                        | 57.7% (15)                     | 45.5% (15)                     | 0.35     |
| $\geq$ 1 (n)                                                 | 42.3% (11)                     | 54.6% (18)                     |          |
| Pre-pregnancy BMI (kg/cm <sup>2</sup> )                      | 26.3 $\pm$ 7.3                 | 25.2 $\pm$ 6.6                 | 0.54     |
| Underweight <18.4                                            | 0% (0)                         | 3.1% (1)                       | 0.81     |
| Normal weight (18.5-24.9)                                    | 60.0 (15)                      | 62.5% (20)                     |          |
| Overweight (25.0-29.9)                                       | 20.0 (5)                       | 18.8% (6)                      |          |
| Obese $\geq$ 30.0                                            | 20.0%(5)                       | 15.6% (5)                      |          |
| Education levels                                             |                                |                                |          |
| Non-university degree                                        | 42.3% (11)                     | 33.3% (11)                     | 0.48     |
| University degree                                            | 57.7% (15)                     | 66.7% (22)                     |          |
| LPP history (yes) <sup>1</sup>                               | 46.2% (12)                     | 54.6% (18)                     | 0.52     |
| Prevalence of pregnancy-related LPP over the last week (yes) | 34.6% (9)                      | 48.5% (16)                     | 0.33     |
| Severity of pregnancy-related LPP over the last week         | 2.9 $\pm$ 1.9                  | 4.1 $\pm$ 2.3                  | 0.18     |
| State anxiety                                                | 37.4 $\pm$ 11.6                | 34.2 $\pm$ 9.1                 | 0.28     |
| Trait anxiety                                                | 39.8 $\pm$ 10.0                | 37.1 $\pm$ 9.4                 | 0.26     |
| Daily steps                                                  | 5328 $\pm$ 1551                | 5569 $\pm$ 1552                | 0.80     |
| Daily MVPA (min)                                             | 16.3 $\pm$ 10.0                | 17.4 $\pm$ 13.2                | 0.97     |

FT: fertility treatment; SP: spontaneous conception; OS: ovarian stimulation; IUI: intrauterine insemination; IVF: *in vitro* fertilization; BMI : body mass index; LPP : lumbopelvic pain; MVPA: moderate-to-vigorous physical activity

<sup>1</sup> LPP history includes history of pregnancy-related LPP and LPP not related to pregnancy

Missing data: pre-pregnancy BMI: 1 FT, 1 SP; state and trait anxiety : 1 SP; accelerometer data: 4 SP; 6 FT

2

3

1  
2  
3 **1 Figure legend**  
4

5 2

6  
7 **3 Figure 1:** Prevalence of pregnancy-related lumbopelvic pain (LPP) in women who conceived  
8  
9 4 spontaneously (SP) or after fertility treatments (FT) over the course of pregnancy.

10 **5 Figure 1 footnote:** TR1: 1<sup>st</sup> trimester of pregnancy; TR2: 2<sup>nd</sup> trimester of pregnancy; TR3: 3<sup>rd</sup>  
11  
12 6 trimester of pregnancy.  
13

14 7

15  
16  
17  
18 **8 Figure 2:** Evolution of pregnancy-related lumbopelvic pain (LPP) severity in women who  
19  
20 9 conceived spontaneously (SP) or after fertility treatments (FT) over the course of pregnancy.

21  
22 **10 Figure 2 footnote:** TR1: 1<sup>st</sup> trimester of pregnancy; TR2: 2<sup>nd</sup> trimester of pregnancy; TR3: 3<sup>rd</sup>  
23  
24 11 trimester of pregnancy.  
25

26 12

27  
28  
29 **13 Figure 3:** Evolution of trait anxiety in women who conceived spontaneously (SP) or after  
30  
31 14 fertility treatments (FT) over the course of pregnancy.

32  
33 **15 Figure 3 footnote:** TR1: 1<sup>st</sup> trimester of pregnancy; TR2: 2<sup>nd</sup> trimester of pregnancy; TR3: 3<sup>rd</sup>  
34  
35 16 trimester of pregnancy.  
36

37 17

38  
39  
40 **18 Figure 4:** Evolution of state anxiety in women who conceived spontaneously (SP) or after  
41  
42 19 fertility treatments (FT) over the course of pregnancy.

43  
44 **20 Figure 4 footnote:** TR1: 1<sup>st</sup> trimester of pregnancy; TR2: 2<sup>nd</sup> trimester of pregnancy; TR3: 3<sup>rd</sup>  
45  
46 21 trimester of pregnancy.  
47

48 22

49  
50 **23 Figure 5:** Evolution of activity limitations in women who conceived spontaneously (SP) or  
51  
52 24 after fertility treatments (FT) over the course of pregnancy.  
53  
54

55  
56  
57  
58  
59  
60

1  
2  
3 1 **Figure 5 footnote:** TR1: 1<sup>st</sup> trimester of pregnancy; TR2: 2<sup>nd</sup> trimester of pregnancy; TR3: 3<sup>rd</sup>  
4 trimester of pregnancy.  
5  
6

7 3

8  
9 4 **Figure 6:** Evolution of daily moderate-to-vigorous physical activity (MVPA) in women who  
10 conceived spontaneously (SP) or after fertility treatments (FT) over the course of pregnancy.  
11  
12

13 6 **Figure 6 footnote:** TR1: 1<sup>st</sup> trimester of pregnancy; TR2: 2<sup>nd</sup> trimester of pregnancy; TR3: 3<sup>rd</sup>  
14 trimester of pregnancy.  
15  
16

17 8

18  
19 9 **Figure 7:** Evolution of daily step counts in women who conceived spontaneously (SP) or  
20 after fertility treatments (FT) over the course of pregnancy.  
21  
22

23 11 **Figure 7 footnote:** TR1: 1<sup>st</sup> trimester of pregnancy; TR2: 2<sup>nd</sup> trimester of pregnancy; TR3: 3<sup>rd</sup>  
24 trimester of pregnancy.  
25  
26

27 13

28  
29 14 **Figure 8:** Correlation between the severity of pregnancy-related lumbopelvic pain (LPP) and  
30 activity limitations in the 2<sup>nd</sup> trimester of pregnancy (TR2).  
31  
32

33 16

34  
35 17 **Figure 9:** Correlation between the severity of pregnancy-related lumbopelvic pain (LPP) and  
36 daily moderate-to-vigorous physical activity (MVPA) in the 2<sup>nd</sup> trimester of pregnancy (TR2).  
37  
38

39 19

40  
41 20 **Figure 10:** Correlation between the severity of pregnancy-related lumbopelvic pain (LPP) and  
42 daily step counts in the 2<sup>nd</sup> trimester of pregnancy (TR2).  
43  
44

45 22

46  
47 23 **Figure 11:** Correlation between the severity of pregnancy-related lumbopelvic pain (LPP) and  
48 activity limitations in the 3<sup>rd</sup> trimester of pregnancy (TR3).  
49  
50

51 25

1  
2  
3 1 **Figure 12:** Correlation between the severity of pregnancy-related lumbopelvic pain (LPP) and  
4  
5 2 daily moderate-to-vigorous physical activity (MVPA) in the 3<sup>rd</sup> trimester of pregnancy (TR3).  
6

7 3

8  
9 4 **Figure 13:** Correlation between the severity of pregnancy-related lumbopelvic pain (LPP) and  
10  
11 5 daily step counts in the 3<sup>rd</sup> trimester of pregnancy (TR3).  
12

13 6  
14  
15  
16  
17  
18  
19  
20  
21  
22  
23  
24  
25  
26  
27  
28  
29  
30  
31  
32  
33  
34  
35  
36  
37  
38  
39  
40  
41  
42  
43  
44  
45  
46  
47  
48  
49  
50  
51  
52  
53  
54  
55  
56  
57  
58  
59  
60

For peer review only



Prevalence of pregnancy-related lumbopelvic pain (LPP) in women who conceived spontaneously (SP) or after fertility treatments (FT) over the course of pregnancy.

263x132mm (300 x 300 DPI)

review only

1  
2  
3  
4  
5  
6  
7  
8  
9  
10  
11  
12  
13  
14  
15  
16  
17  
18  
19  
20  
21  
22  
23  
24  
25  
26  
27  
28  
29  
30  
31  
32  
33  
34  
35  
36  
37  
38  
39  
40  
41  
42  
43  
44  
45  
46  
47  
48  
49  
50  
51  
52  
53  
54  
55  
56  
57  
58  
59  
60



Evolution of pregnancy-related lumbopelvic pain (LPP) severity in women who conceived spontaneously (SP) or after fertility treatments (FT) over the course of pregnancy.

223x119mm (300 x 300 DPI)

review only



Evolution of trait anxiety in women who conceived spontaneously (SP) or after fertility treatments (FT) over the course of pregnancy.

227x101mm (300 x 300 DPI)



1  
2  
3  
4  
5  
6  
7  
8  
9  
10  
11  
12  
13  
14  
15  
16  
17  
18  
19  
20  
21  
22  
23  
24  
25  
26  
27  
28  
29  
30  
31  
32  
33  
34  
35  
36  
37  
38  
39  
40  
41  
42  
43  
44  
45  
46  
47  
48  
49  
50  
51  
52  
53  
54  
55  
56  
57  
58  
59  
60

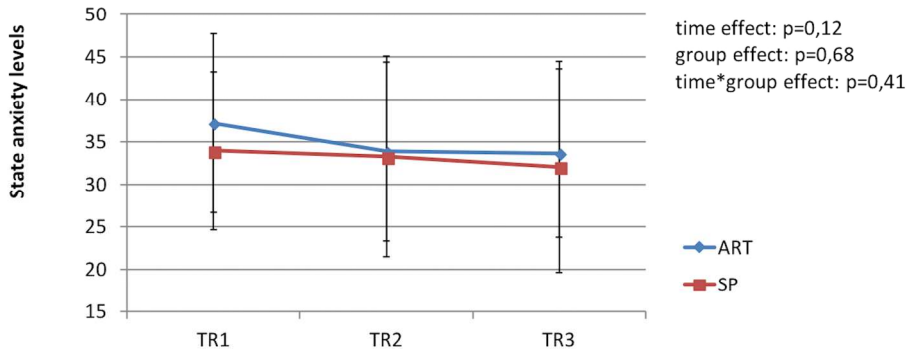

Evolution of state anxiety in women who conceived spontaneously (SP) or after fertility treatments (FT) over the course of pregnancy.

227x101mm (300 x 300 DPI)

er review only



Evolution of activity limitations in women who conceived spontaneously (SP) or after fertility treatments (FT) over the course of pregnancy.

223x128mm (300 x 300 DPI)

review only

1  
2  
3  
4  
5  
6  
7  
8  
9  
10  
11  
12  
13  
14  
15  
16  
17  
18  
19  
20  
21  
22  
23  
24  
25  
26  
27  
28  
29  
30  
31  
32  
33  
34  
35  
36  
37  
38  
39  
40  
41  
42  
43  
44  
45  
46  
47  
48  
49  
50  
51  
52  
53  
54  
55  
56  
57  
58  
59  
60



Evolution of daily moderate-to-vigorous physical activity (MVPA) in women who conceived spontaneously (SP) or after fertility treatments (FT) over the course of pregnancy.

227x104mm (300 x 300 DPI)

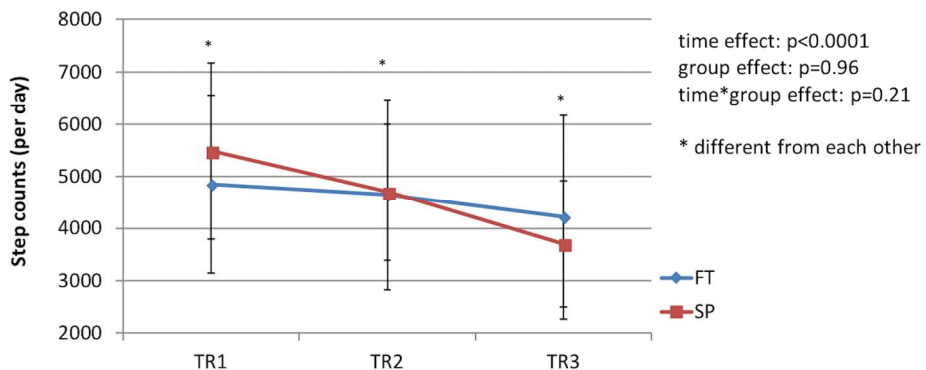

Evolution of daily step counts in women who conceived spontaneously (SP) or after fertility treatments (FT) over the course of pregnancy.

225x106mm (300 x 300 DPI)

1  
2  
3  
4  
5  
6  
7  
8  
9  
10  
11  
12  
13  
14  
15  
16  
17  
18  
19  
20  
21  
22  
23  
24  
25  
26  
27  
28  
29  
30  
31  
32  
33  
34  
35  
36  
37  
38  
39  
40  
41  
42  
43  
44  
45  
46  
47  
48  
49  
50  
51  
52  
53  
54  
55  
56  
57  
58  
59  
60



Correlation between the severity of pregnancy-related lumbopelvic pain (LPP) and activity limitations in the 2nd trimester of pregnancy (TR2).

232x133mm (300 x 300 DPI)

Review only



Correlation between the severity of pregnancy-related lumbopelvic pain (LPP) and daily moderate-to-vigorous physical activity (MVPA) in the 2nd trimester of pregnancy (TR2).

233x115mm (300 x 300 DPI)

review only

1  
2  
3  
4  
5  
6  
7  
8  
9  
10  
11  
12  
13  
14  
15  
16  
17  
18  
19  
20  
21  
22  
23  
24  
25  
26  
27  
28  
29  
30  
31  
32  
33  
34  
35  
36  
37  
38  
39  
40  
41  
42  
43  
44  
45  
46  
47  
48  
49  
50  
51  
52  
53  
54  
55  
56  
57  
58  
59  
60



Correlation between the severity of pregnancy-related lumbopelvic pain (LPP) and daily step counts in the 2nd trimester of pregnancy (TR2).

234x109mm (300 x 300 DPI)

For review only

1  
2  
3  
4  
5  
6  
7  
8  
9  
10  
11  
12  
13  
14  
15  
16  
17  
18  
19  
20  
21  
22  
23  
24  
25  
26  
27  
28  
29  
30  
31  
32  
33  
34  
35  
36  
37  
38  
39  
40  
41  
42  
43  
44  
45  
46  
47  
48  
49  
50  
51  
52  
53  
54  
55  
56  
57  
58  
59  
60



Correlation between the severity of pregnancy-related lumbopelvic pain (LPP) and activity limitations in the 3rd trimester of pregnancy (TR3).

227x129mm (300 x 300 DPI)

Review only



1  
2  
3  
4  
5  
6  
7  
8  
9  
10  
11  
12  
13  
14  
15  
16  
17  
18  
19  
20  
21  
22  
23  
24  
25  
26  
27  
28  
29  
30  
31  
32  
33  
34  
35  
36  
37  
38  
39  
40  
41  
42  
43  
44  
45  
46  
47  
48  
49  
50  
51  
52  
53  
54  
55  
56  
57  
58  
59  
60



Correlation between the severity of pregnancy-related lumbopelvic pain (LPP) and daily moderate-to-vigorous physical activity (MVPA) in the 3rd trimester of pregnancy (TR3).

227x106mm (300 x 300 DPI)

For peer review only

1  
2  
3  
4  
5  
6  
7  
8  
9  
10  
11  
12  
13  
14  
15  
16  
17  
18  
19  
20  
21  
22  
23  
24  
25  
26  
27  
28  
29  
30  
31  
32  
33  
34  
35  
36  
37  
38  
39  
40  
41  
42  
43  
44  
45  
46  
47  
48  
49  
50  
51  
52  
53  
54  
55  
56  
57  
58  
59  
60



Correlation between the severity of pregnancy-related lumbopelvic pain (LPP) and daily step counts in the 3rd trimester of pregnancy (TR3).

226x116mm (300 x 300 DPI)

review only

**STROBE 2007 (v4) Statement—Checklist of items that should be included in reports of cohort studies**

| Section/Topic             | Item # | Recommendation                                                                                                                                                                       | Reported on page # |
|---------------------------|--------|--------------------------------------------------------------------------------------------------------------------------------------------------------------------------------------|--------------------|
| Title and abstract        | 1      | (a) Indicate the study’s design with a commonly used term in the title or the abstract                                                                                               | 1                  |
|                           |        | (b) Provide in the abstract an informative and balanced summary of what was done and what was found                                                                                  | 2                  |
| <b>Introduction</b>       |        |                                                                                                                                                                                      |                    |
| Background/rationale      | 2      | Explain the scientific background and rationale for the investigation being reported                                                                                                 | 4-5                |
| Objectives                | 3      | State specific objectives, including any prespecified hypotheses                                                                                                                     | 5                  |
| <b>Methods</b>            |        |                                                                                                                                                                                      |                    |
| Study design              | 4      | Present key elements of study design early in the paper                                                                                                                              | 5                  |
| Setting                   | 5      | Describe the setting, locations, and relevant dates, including periods of recruitment, exposure, follow-up, and data collection                                                      | 5-6                |
| Participants              | 6      | (a) Give the eligibility criteria, and the sources and methods of selection of participants. Describe methods of follow-up                                                           | 5                  |
|                           |        | (b) For matched studies, give matching criteria and number of exposed and unexposed                                                                                                  | na                 |
| Variables                 | 7      | Clearly define all outcomes, exposures, predictors, potential confounders, and effect modifiers. Give diagnostic criteria, if applicable                                             | 6-7                |
| Data sources/ measurement | 8*     | For each variable of interest, give sources of data and details of methods of assessment (measurement). Describe comparability of assessment methods if there is more than one group | 6-7                |
| Bias                      | 9      | Describe any efforts to address potential sources of bias                                                                                                                            | -                  |
| Study size                | 10     | Explain how the study size was arrived at                                                                                                                                            | -                  |
| Quantitative variables    | 11     | Explain how quantitative variables were handled in the analyses. If applicable, describe which groupings were chosen and why                                                         | 6-7                |
| Statistical methods       | 12     | (a) Describe all statistical methods, including those used to control for confounding                                                                                                | 7                  |
|                           |        | (b) Describe any methods used to examine subgroups and interactions                                                                                                                  | 7                  |
|                           |        | (c) Explain how missing data were addressed                                                                                                                                          | na                 |
|                           |        | (d) If applicable, explain how loss to follow-up was addressed                                                                                                                       | na                 |
|                           |        | (e) Describe any sensitivity analyses                                                                                                                                                | na                 |
| <b>Results</b>            |        |                                                                                                                                                                                      |                    |

|                          |     |                                                                                                                                                                                                              |                      |
|--------------------------|-----|--------------------------------------------------------------------------------------------------------------------------------------------------------------------------------------------------------------|----------------------|
| Participants             | 13* | (a) Report numbers of individuals at each stage of study—eg numbers potentially eligible, examined for eligibility, confirmed eligible, included in the study, completing follow-up, and analysed            | 8                    |
|                          |     | (b) Give reasons for non-participation at each stage                                                                                                                                                         | 8                    |
|                          |     | (c) Consider use of a flow diagram                                                                                                                                                                           | -                    |
| Descriptive data         | 14* | (a) Give characteristics of study participants (eg demographic, clinical, social) and information on exposures and potential confounders                                                                     | 8, 19 (table 1)      |
|                          |     | (b) Indicate number of participants with missing data for each variable of interest                                                                                                                          | na                   |
|                          |     | (c) Summarise follow-up time (eg, average and total amount)                                                                                                                                                  | 6                    |
| Outcome data             | 15* | Report numbers of outcome events or <b>summary measures over time</b>                                                                                                                                        | 8-9, 20-28 (figures) |
| Main results             | 16  | (a) Give unadjusted estimates and, if applicable, confounder-adjusted estimates and their precision (eg, 95% confidence interval). Make clear which confounders were adjusted for and why they were included | na                   |
|                          |     | (b) Report category boundaries when continuous variables were categorized                                                                                                                                    | na                   |
|                          |     | (c) If relevant, consider translating estimates of relative risk into absolute risk for a meaningful time period                                                                                             | na                   |
| Other analyses           | 17  | Report other analyses done—eg analyses of subgroups and interactions, and sensitivity analyses                                                                                                               | na                   |
| <b>Discussion</b>        |     |                                                                                                                                                                                                              |                      |
| Key results              | 18  | Summarise key results with reference to study objectives                                                                                                                                                     | 10-11                |
| <b>Limitations</b>       |     |                                                                                                                                                                                                              |                      |
| Interpretation           | 20  | Give a cautious overall interpretation of results considering objectives, limitations, multiplicity of analyses, results from similar studies, and other relevant evidence                                   | 12                   |
| Generalisability         | 21  | Discuss the generalisability (external validity) of the study results                                                                                                                                        | 12                   |
| <b>Other information</b> |     |                                                                                                                                                                                                              |                      |
| Funding                  | 22  | Give the source of funding and the role of the funders for the present study and, if applicable, for the original study on which the present article is based                                                | 14                   |

\*Give information separately for cases and controls in case-control studies and, if applicable, for exposed and unexposed groups in cohort and cross-sectional studies.

**Note:** An Explanation and Elaboration article discusses each checklist item and gives methodological background and published examples of transparent reporting. The STROBE checklist is best used in conjunction with this article (freely available on the Web sites of PLoS Medicine at <http://www.plosmedicine.org/>, Annals of Internal Medicine at <http://www.annals.org/>, and Epidemiology at <http://www.epidem.com/>). Information on the STROBE Initiative is available at [www.strobe-statement.org](http://www.strobe-statement.org).
